# Supplementary material for: Discovery of 2-(pyridin-2-yl)aniline as a directing group for the sp2 C–H bond amination mediated by cupric acetate
Source: Royal Society of Chemistry journal article supplement (doi:10.1039/c7ob01353a), 2017-01-01
Supplement: c7ob01353a1.pdf [file c7ob01353a1.pdf]

## Copies of $^1\text{H}$ and $^{13}\text{C}$ NMR Spectra

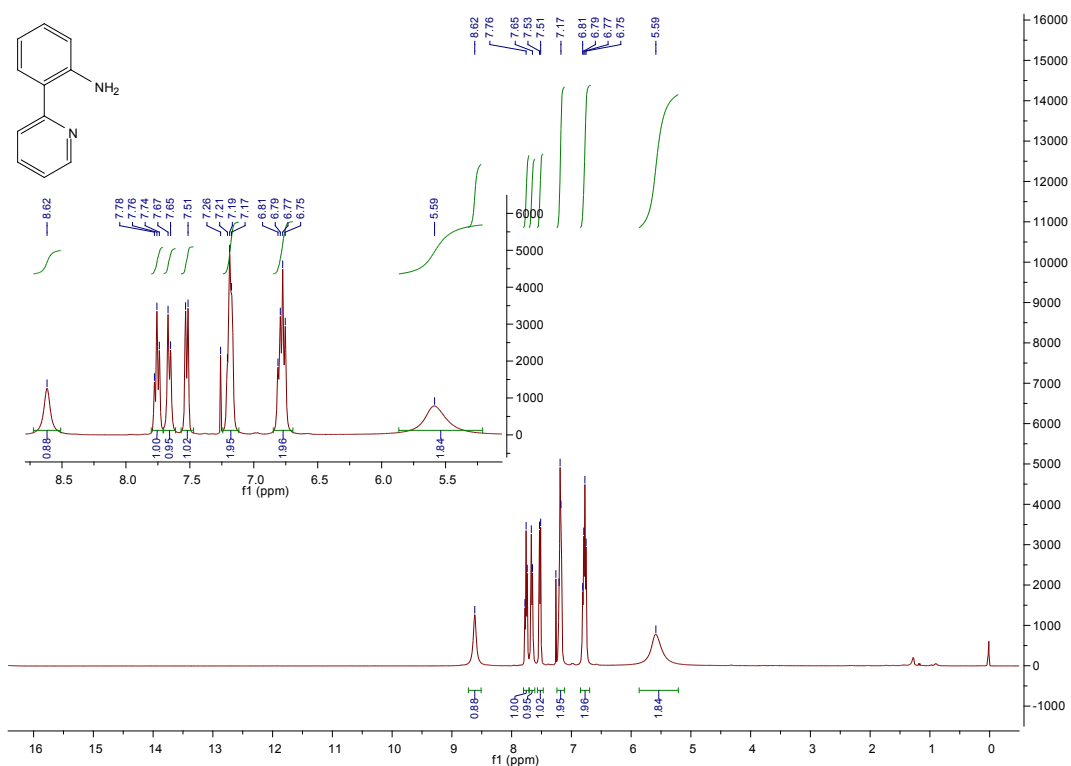

Fig. 1.  $^1\text{H}$  NMR of E

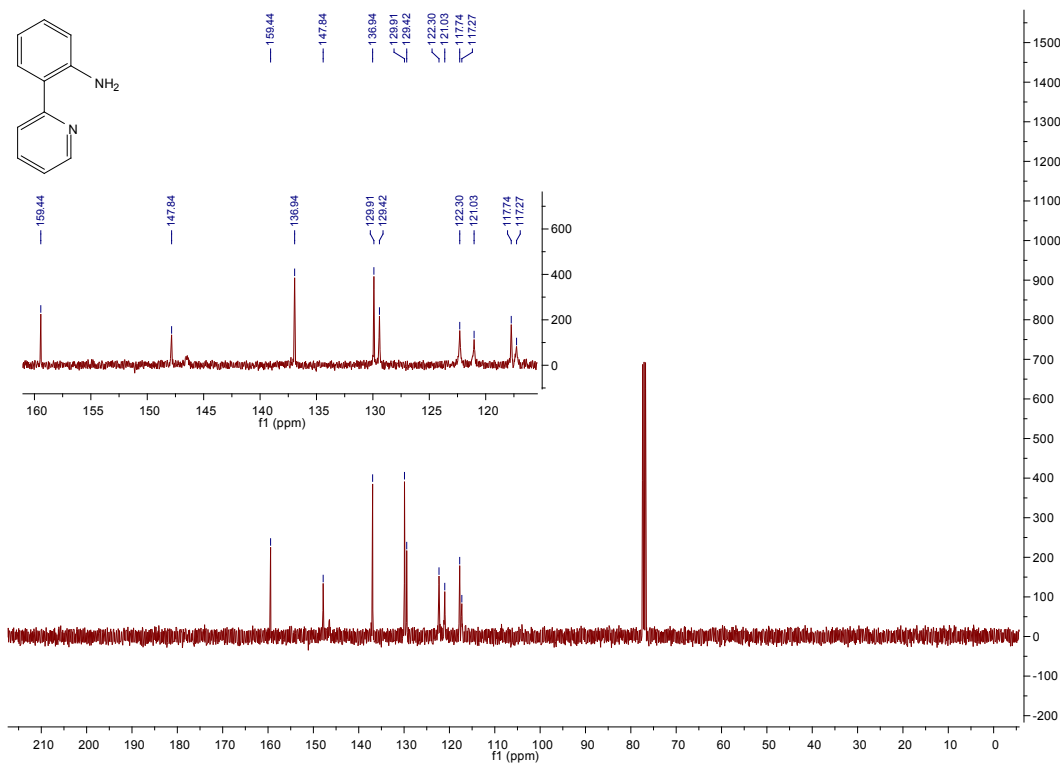

Fig. 2.  $^{13}\text{C}$  NMR of E

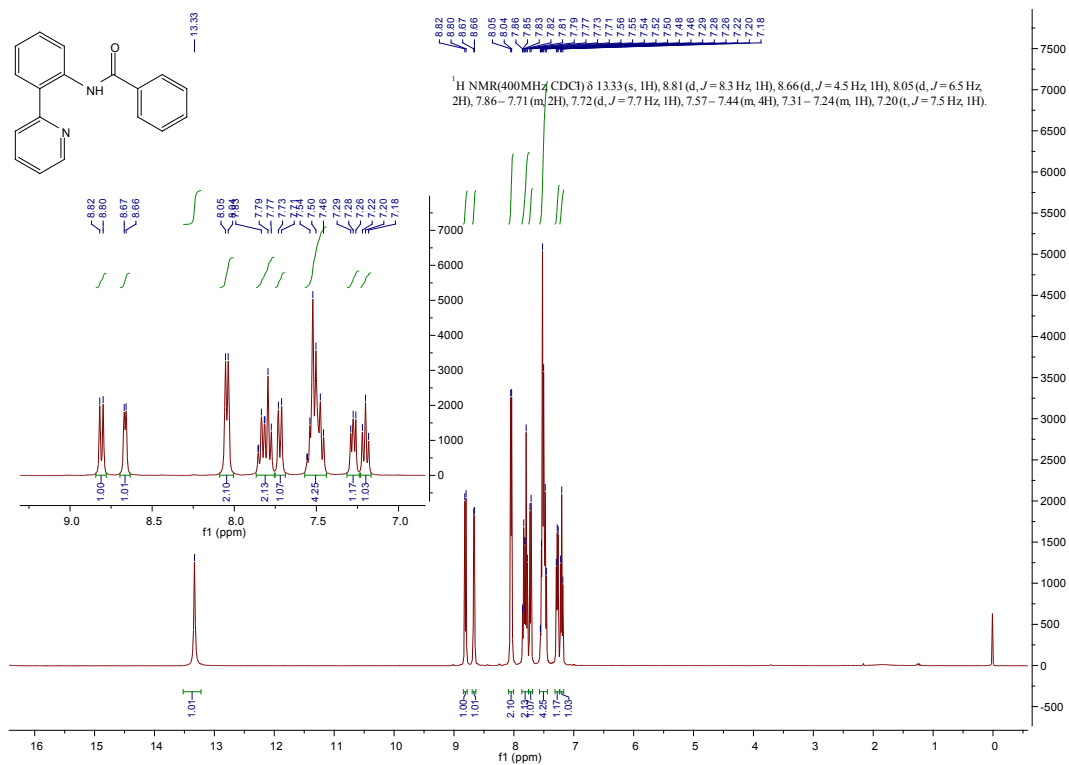

Fig. 3. <sup>1</sup>H NMR of **1a**

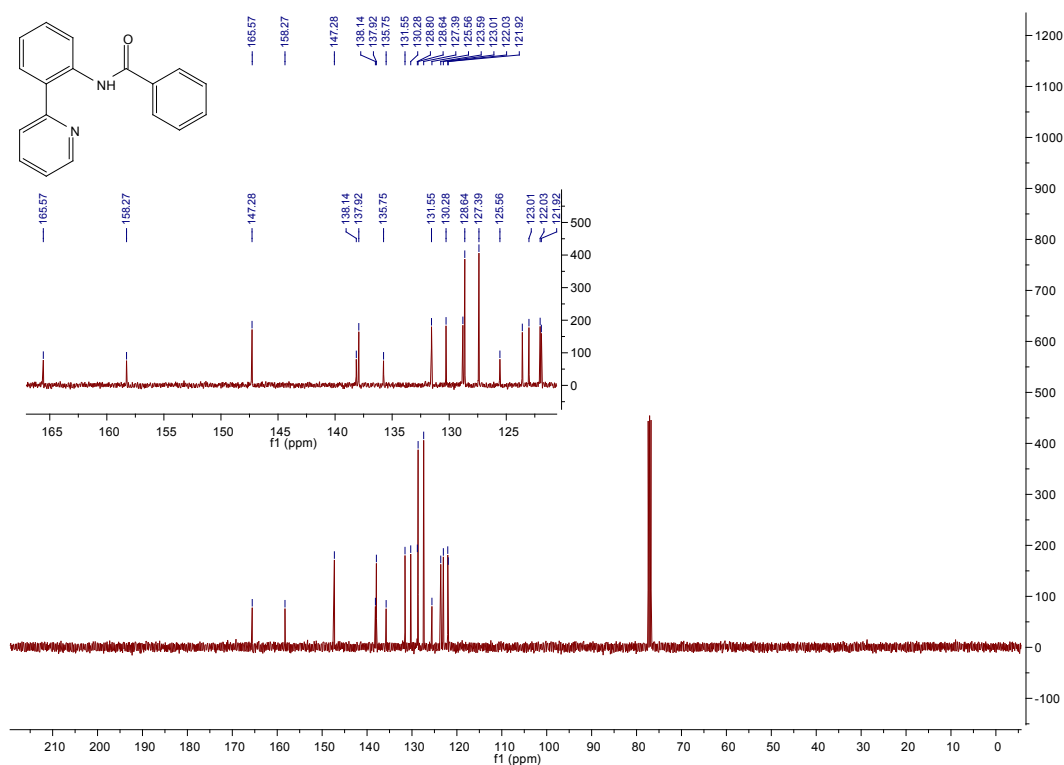

Fig. 4. <sup>13</sup>C NMR of **1a**

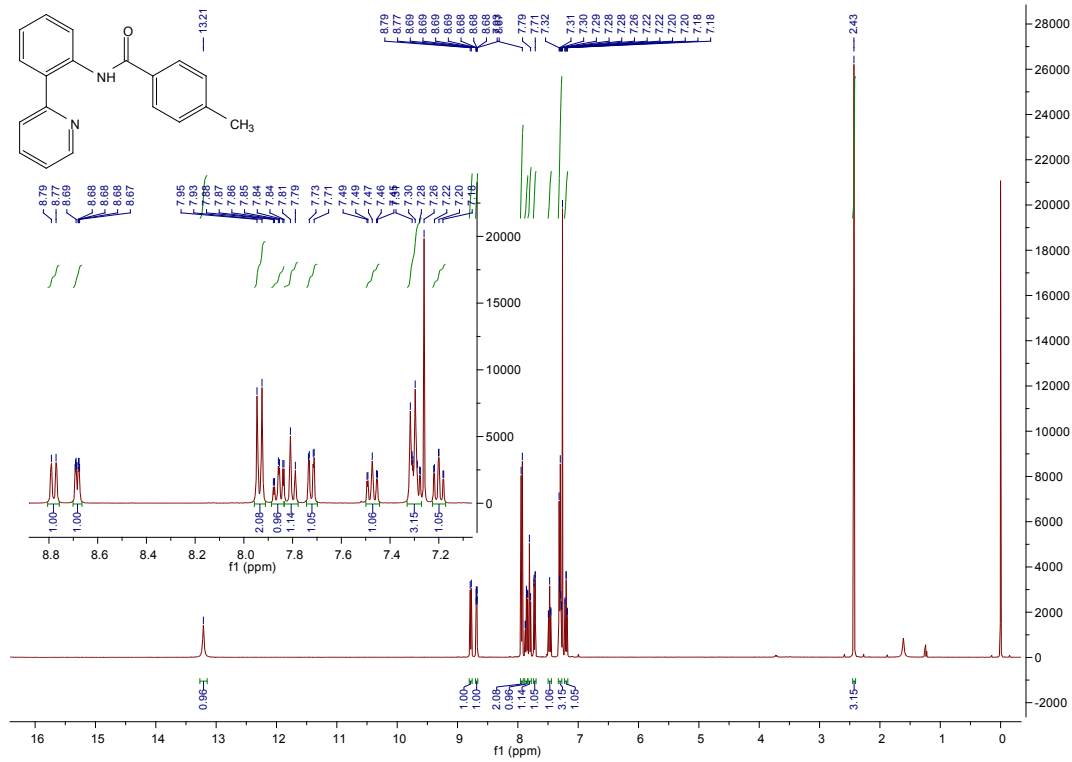

Fig. 5.  $^1\text{H}$  NMR of **1b**

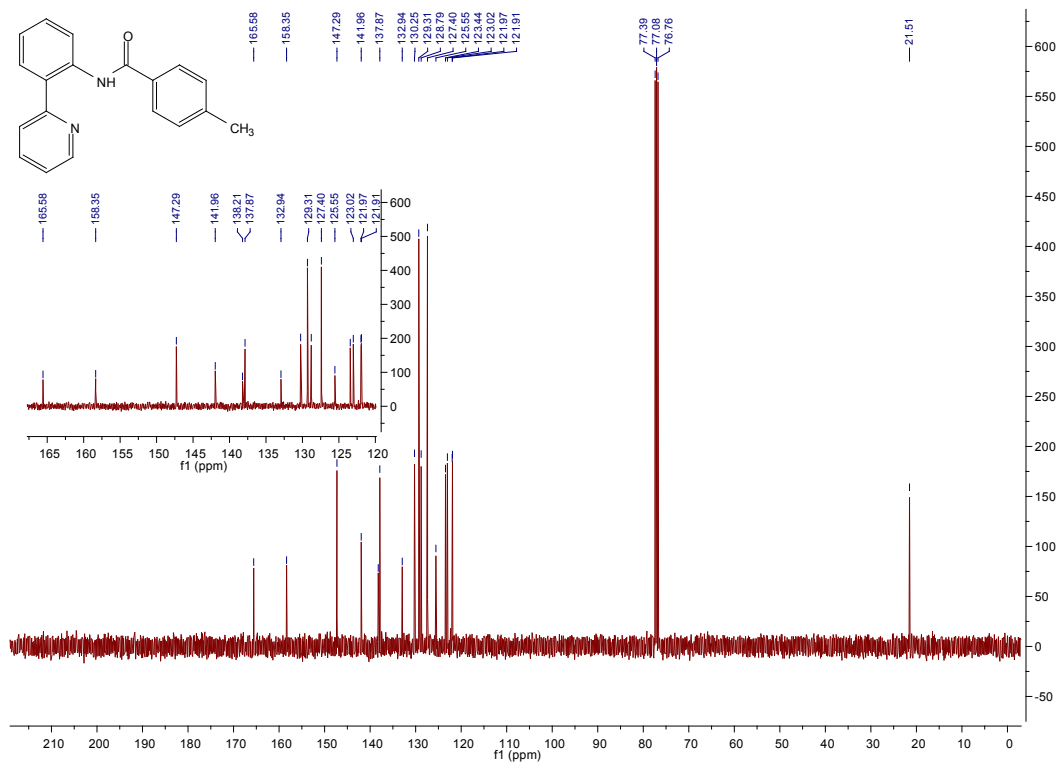

Fig. 6.  $^{13}\text{C}$  NMR of **1b**

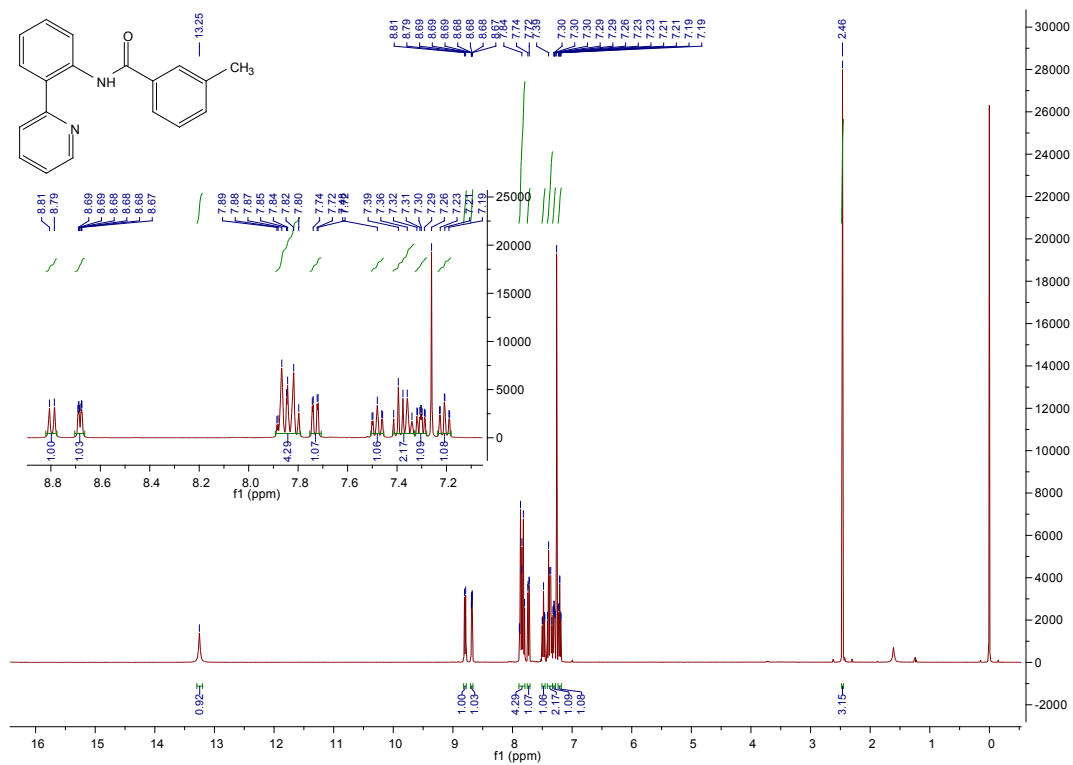

Fig. 7. <sup>1</sup>H NMR of **1c**

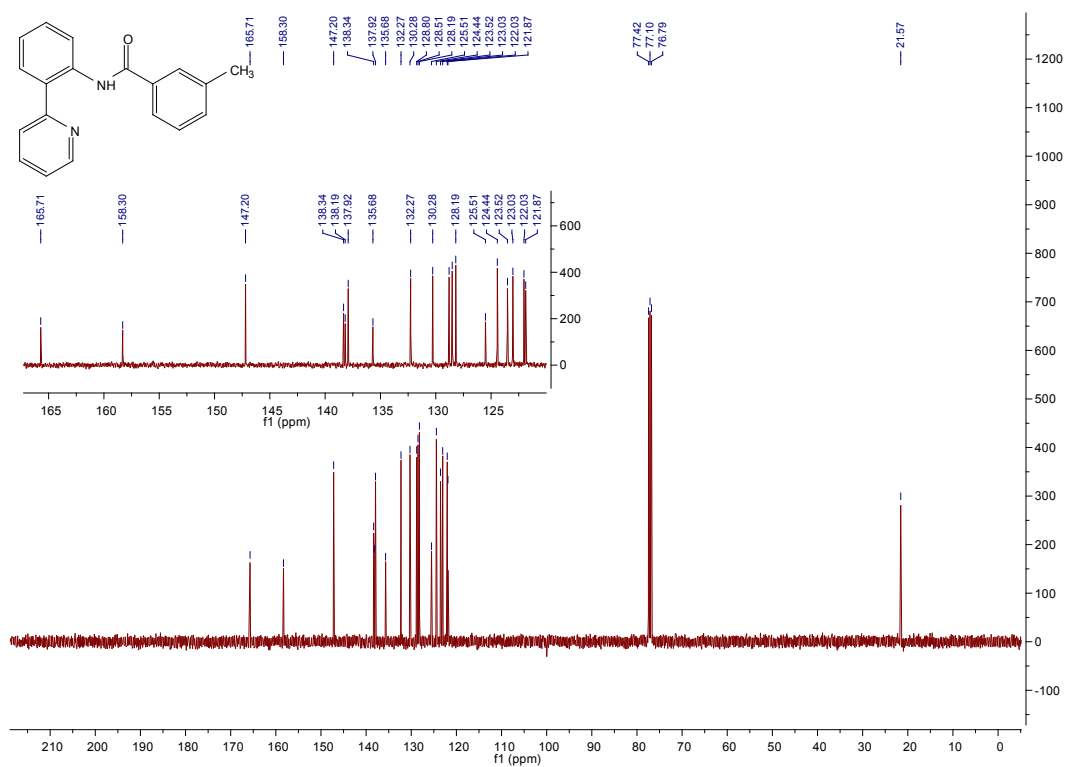

Fig. 8. <sup>13</sup>C NMR of **1c**

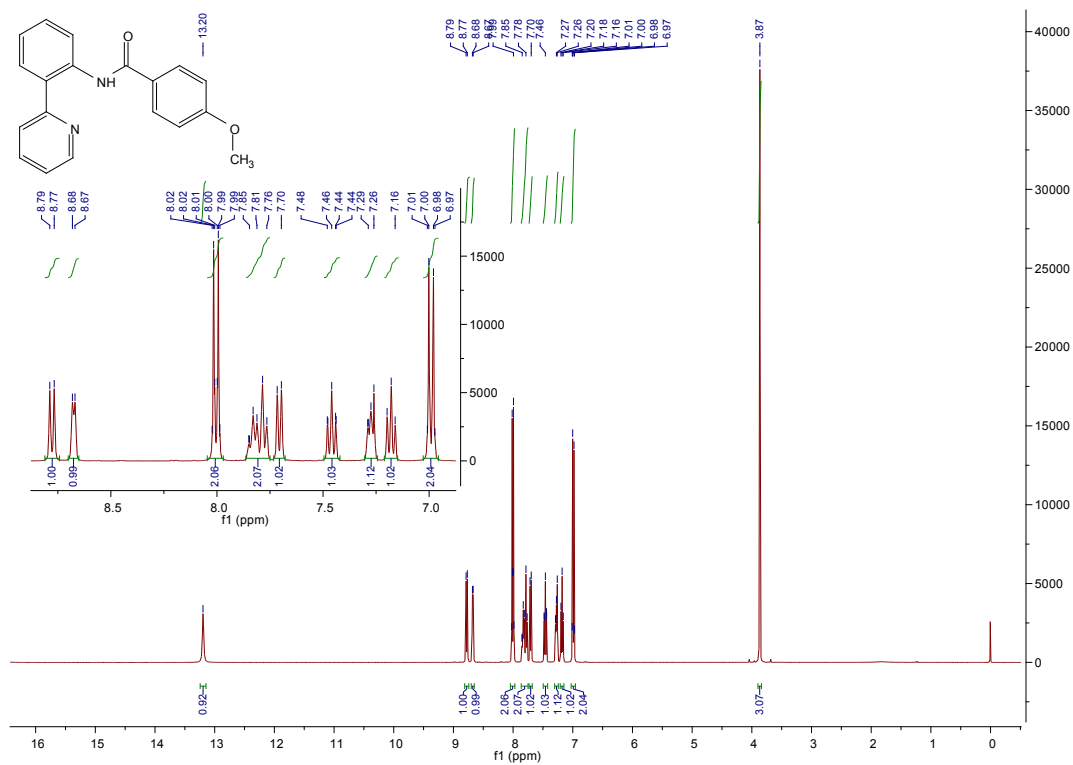

Fig. 9. <sup>1</sup>H NMR of 1d

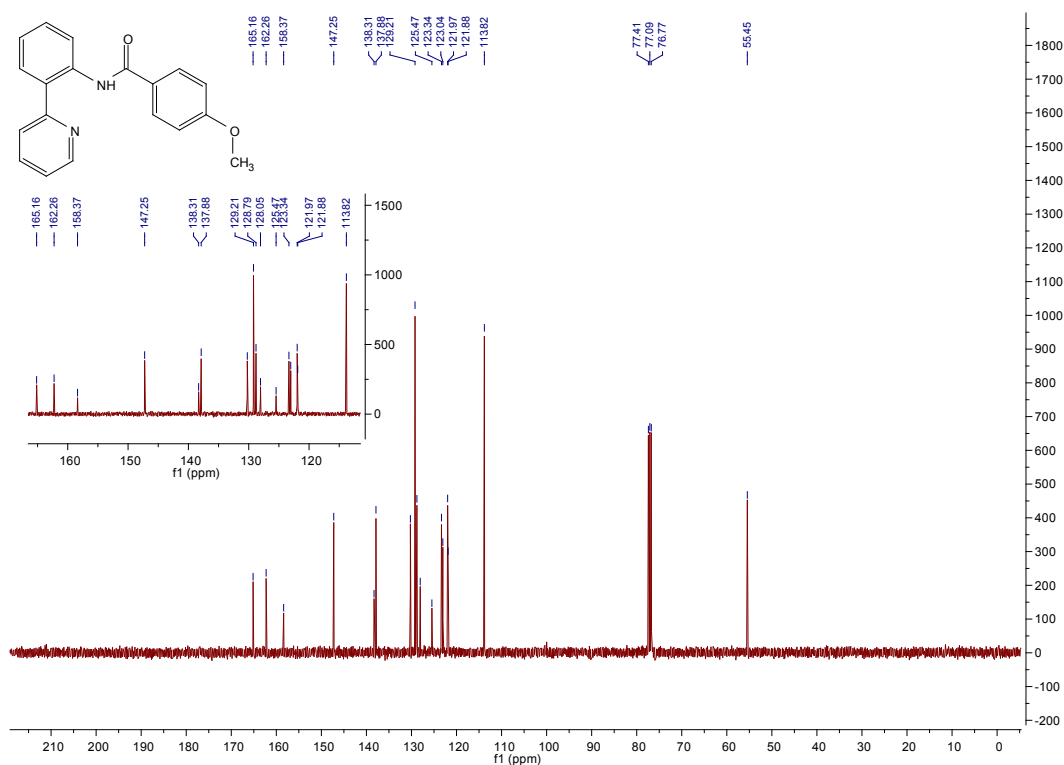

Fig. 10. <sup>13</sup>C NMR of 1d

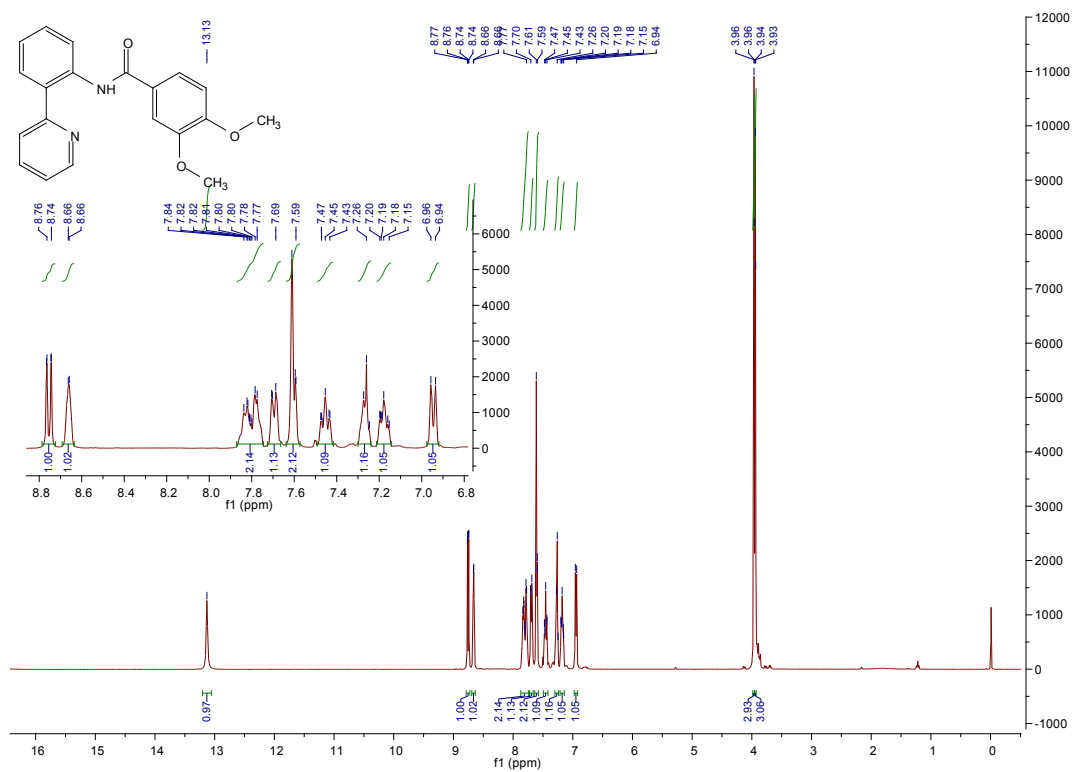

Fig. 11. <sup>1</sup>H NMR of **1e**

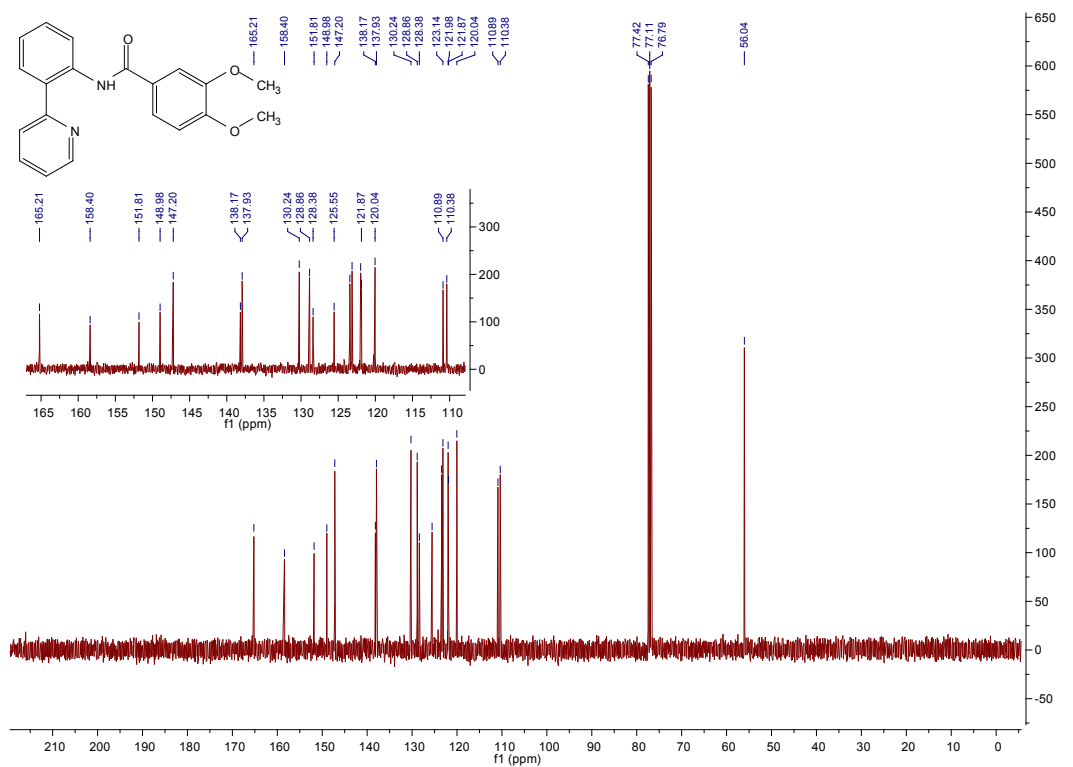

Fig. 12. <sup>13</sup>C NMR of **1e**

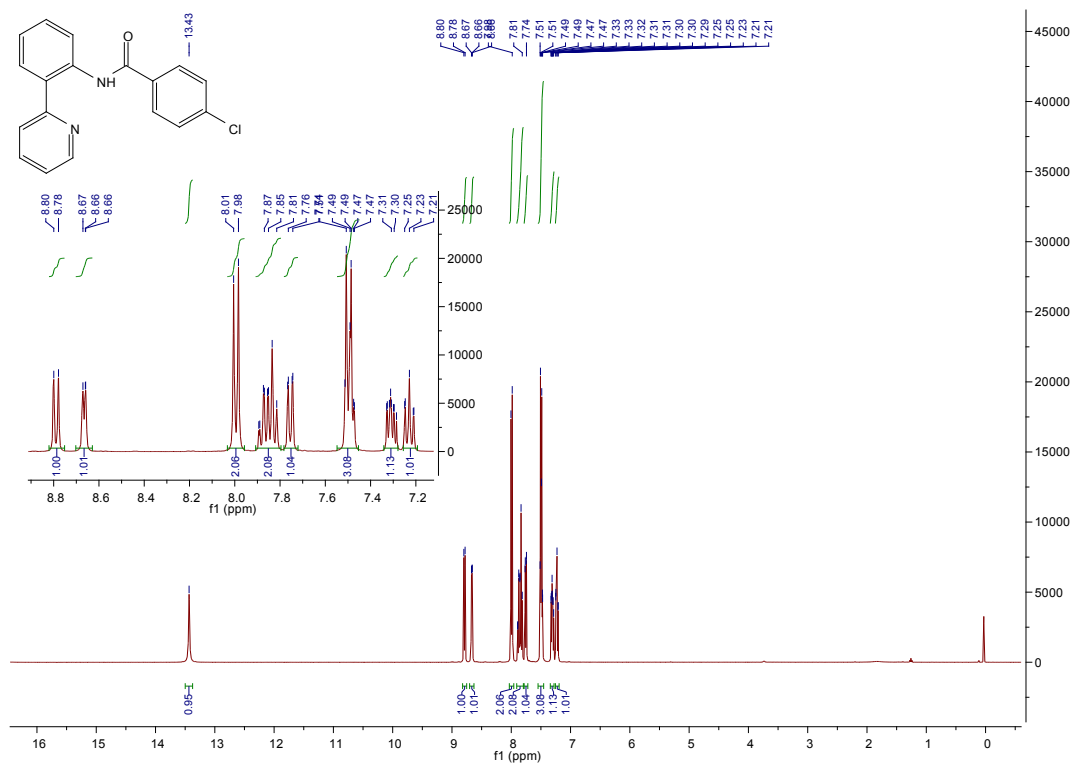

Fig. 13. <sup>1</sup>H NMR of 1f

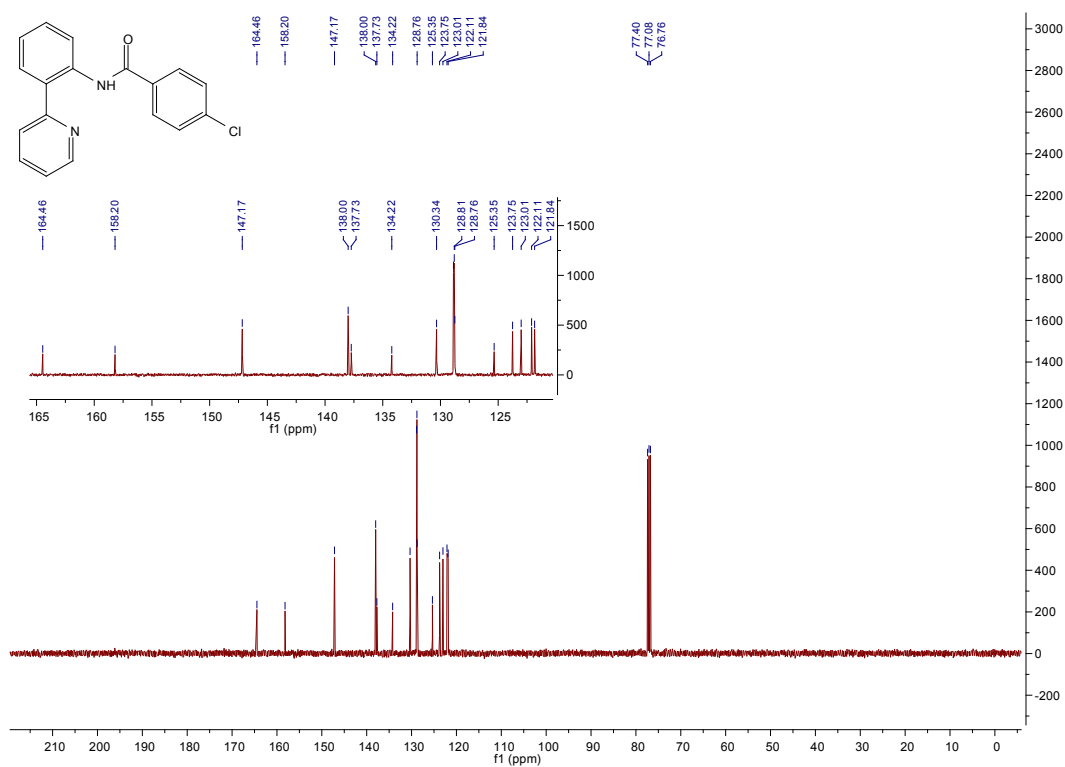

Fig. 14. <sup>13</sup>C NMR of 1f

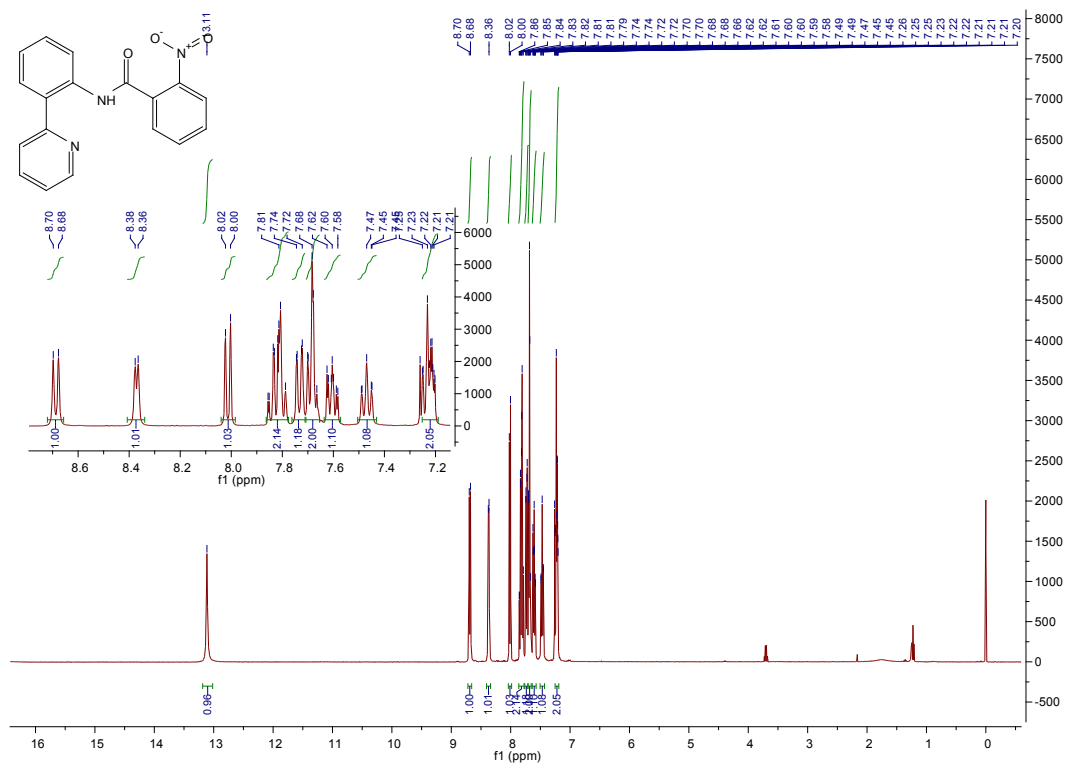

Fig. 15. <sup>1</sup>H NMR of **1g**

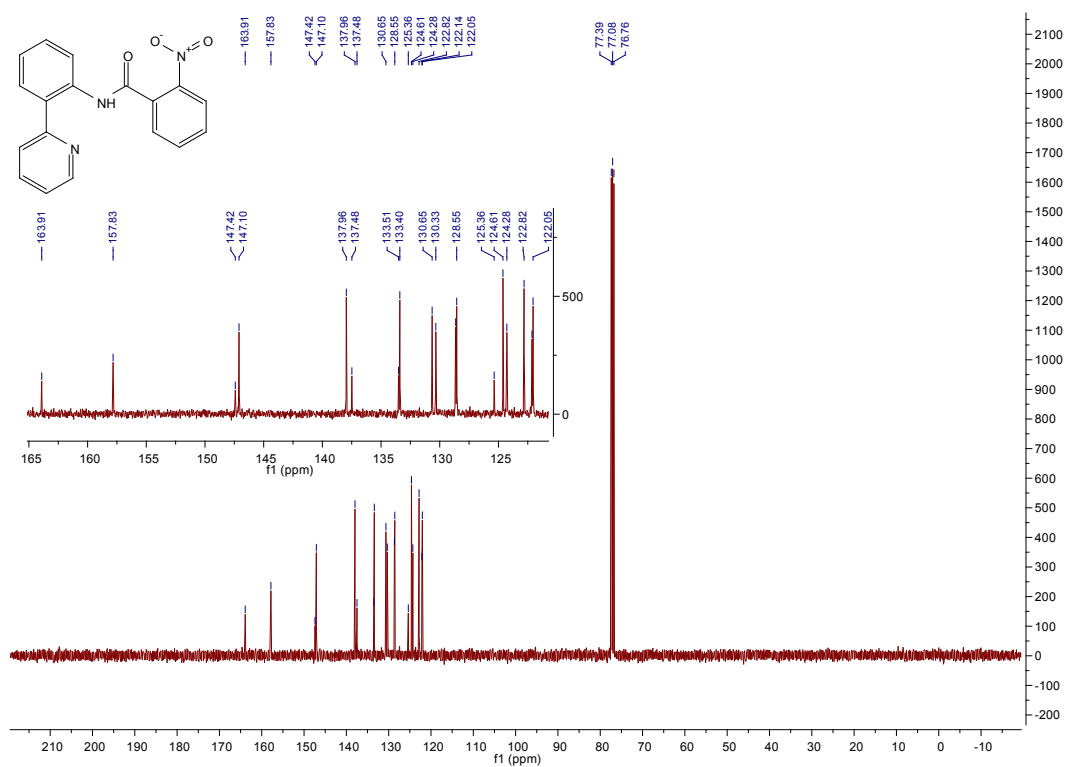

Fig. 16. <sup>13</sup>C NMR of **1g**



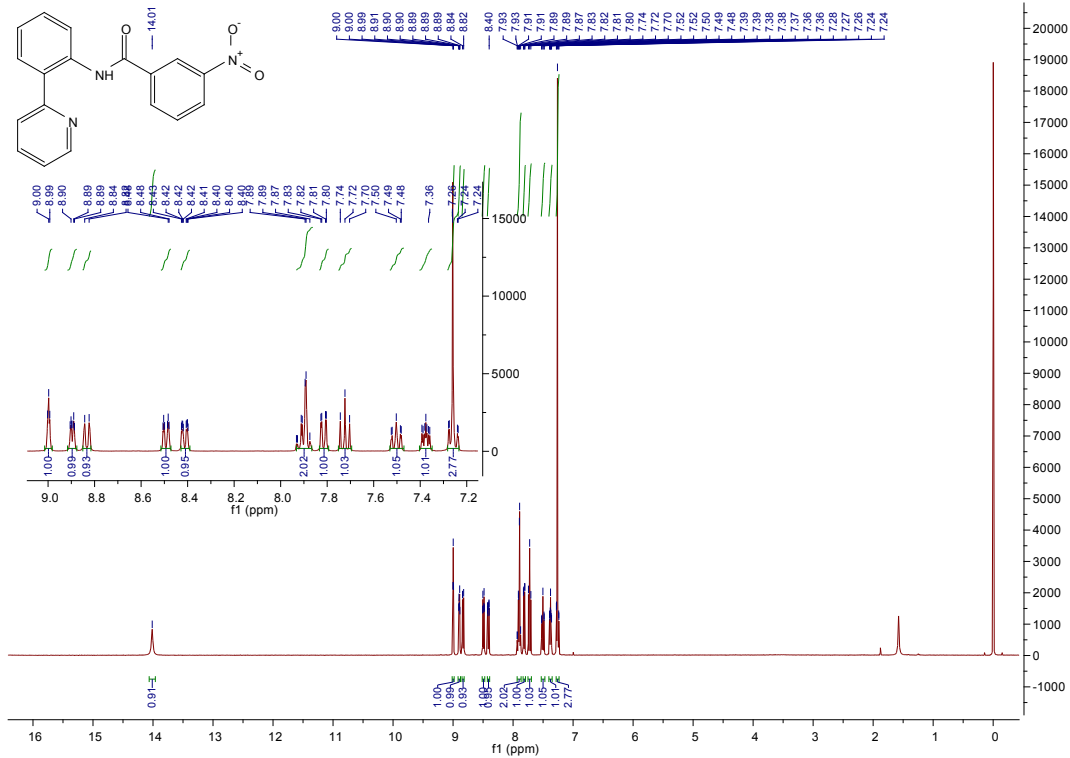

Fig. 17.  $^1\text{H NMR}$  of 1h

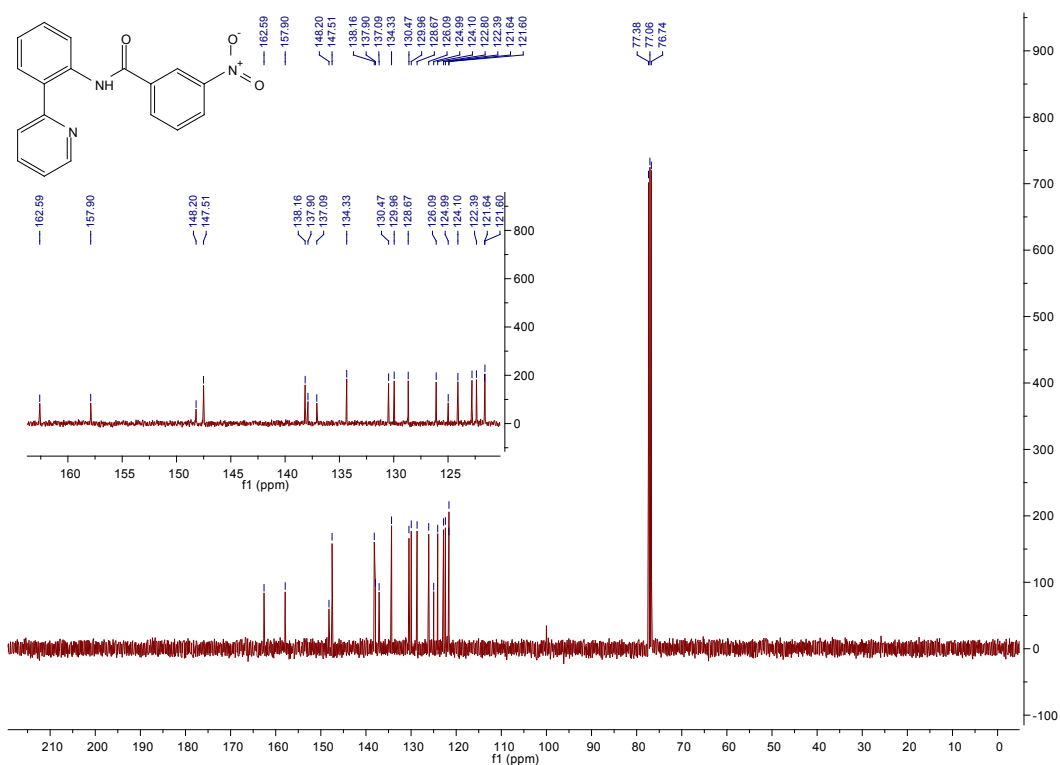

Fig. 18.  $^{13}\text{C NMR}$  of 1h

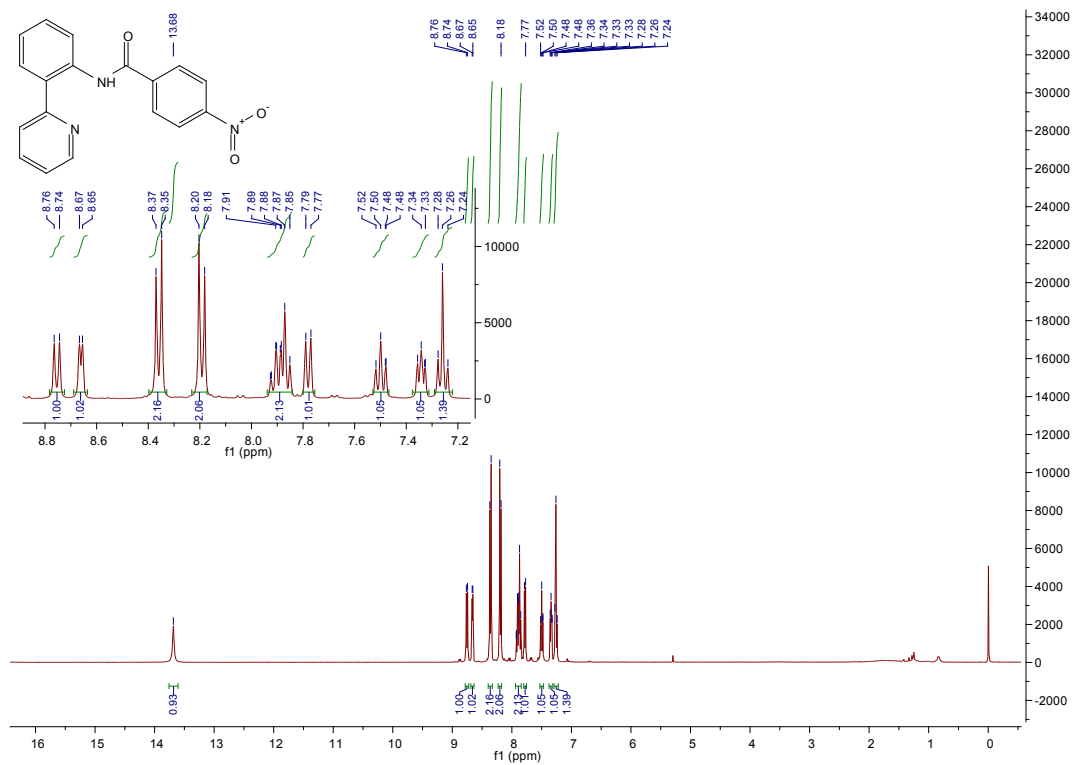

Fig. 19.  $^1\text{H}$  NMR of **1i**

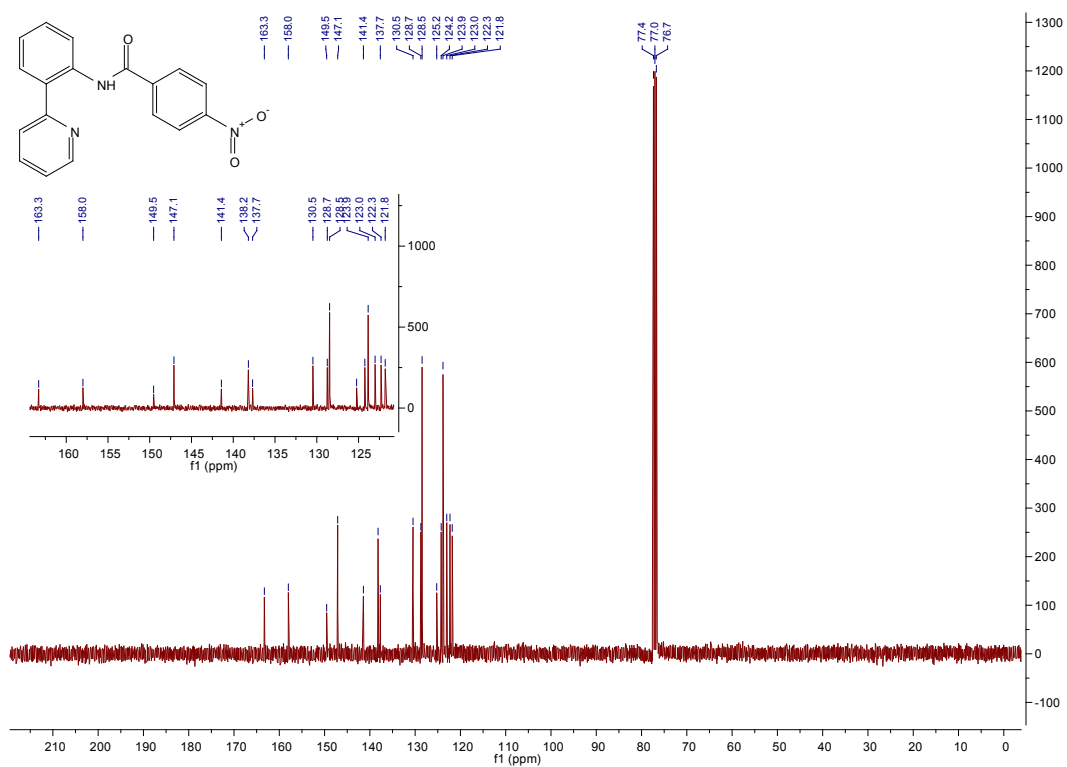

Fig. 20.  $^{13}\text{C}$  NMR of **1i**

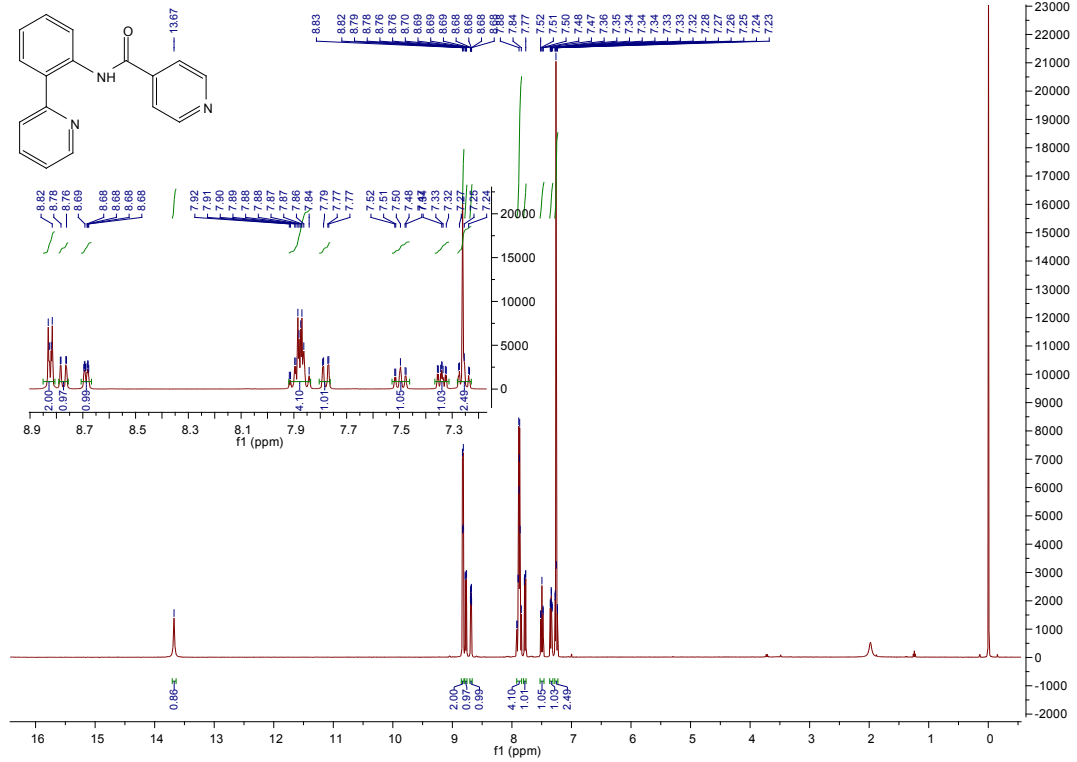

Fig. 21.  $^1\text{H}$  NMR of **1j**

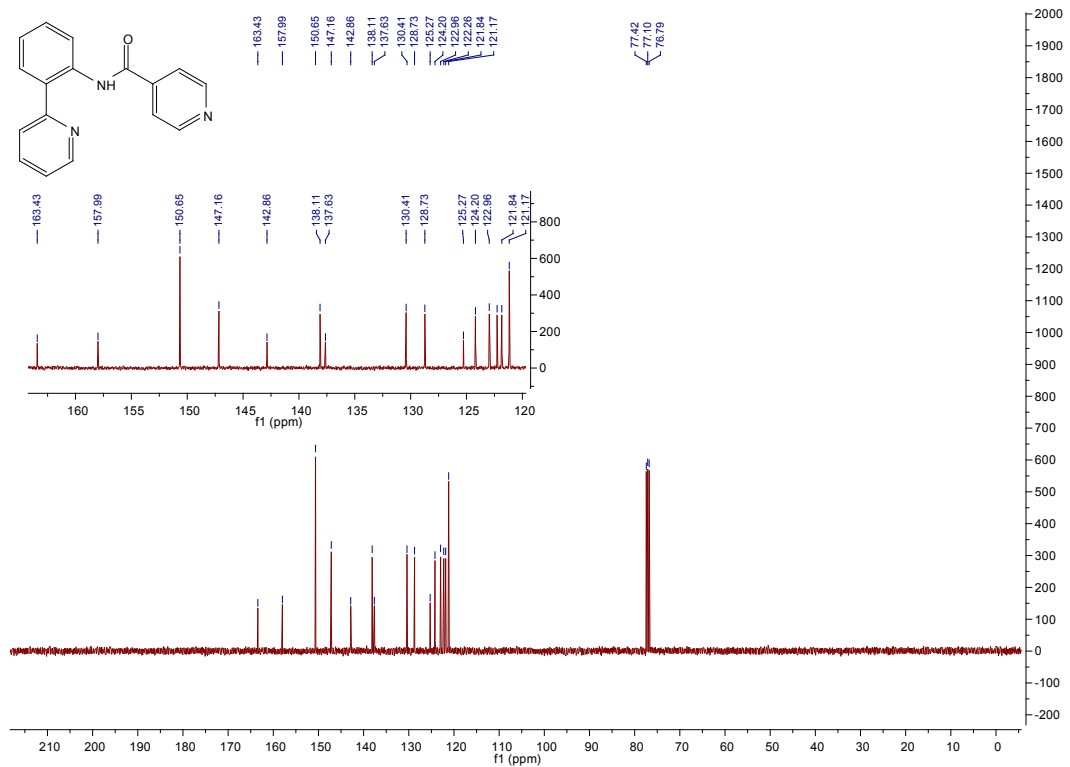

Fig. 22.  $^{13}\text{C}$  NMR of **1j**

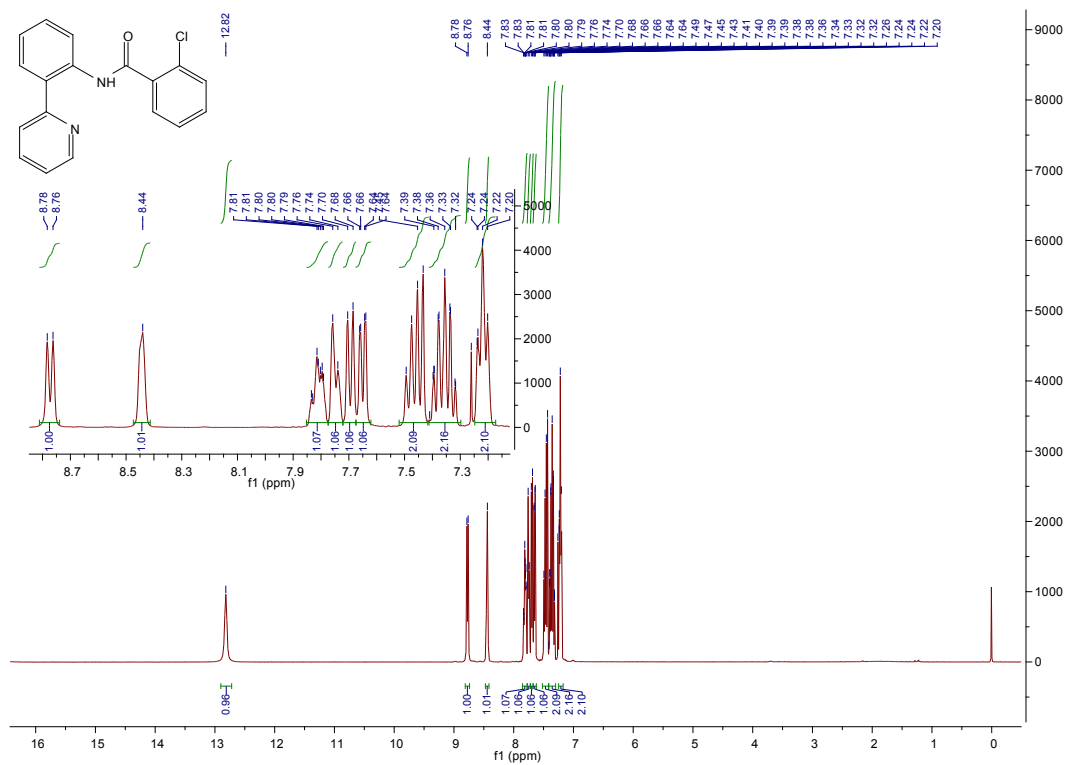

Fig. 23. <sup>1</sup>H NMR of 1k

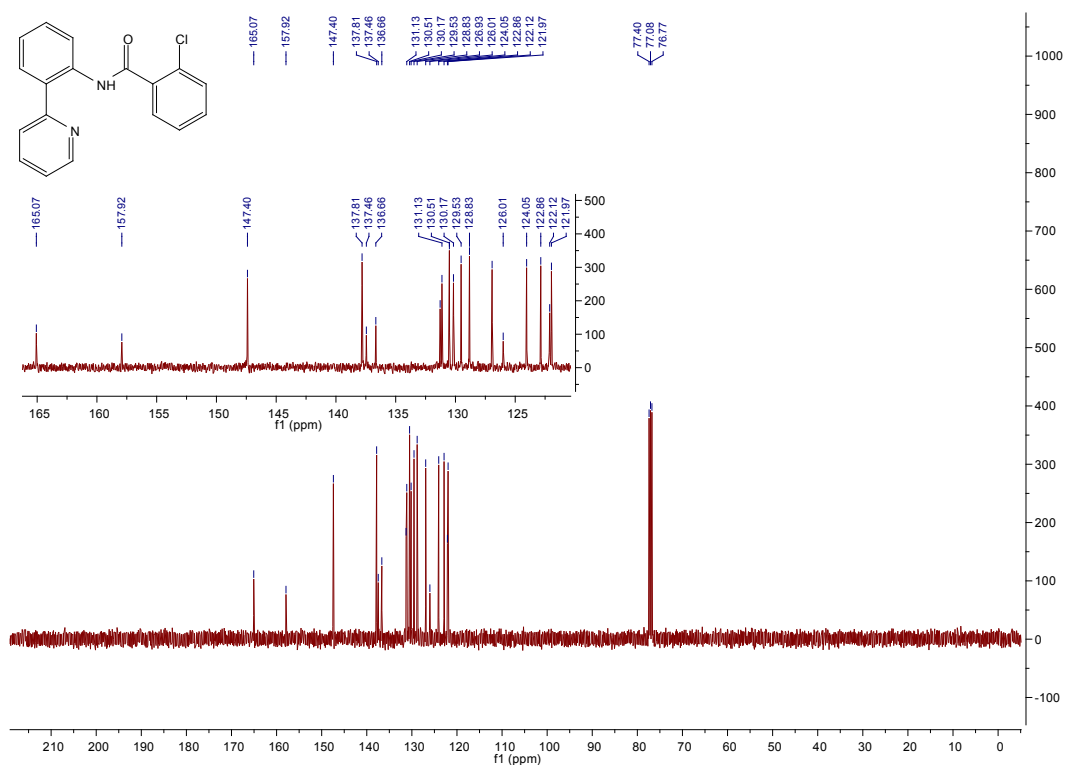

Fig. 24. <sup>13</sup>C NMR of 1k

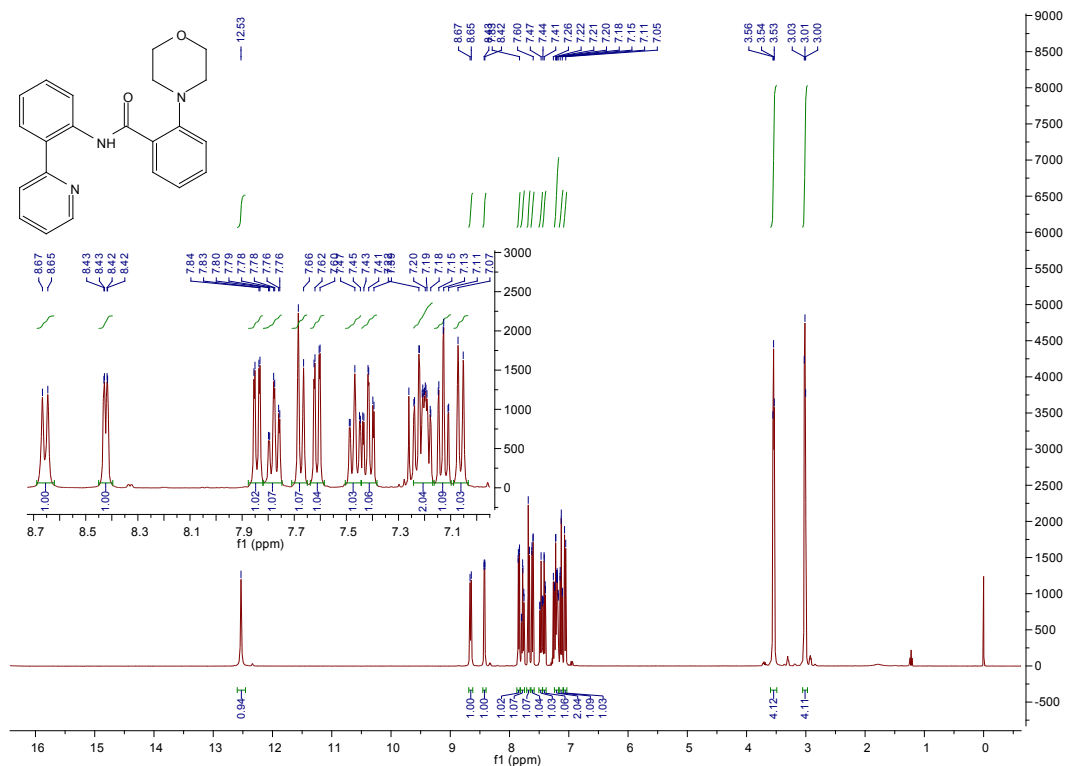

Fig. 25. <sup>1</sup>H NMR of 2a

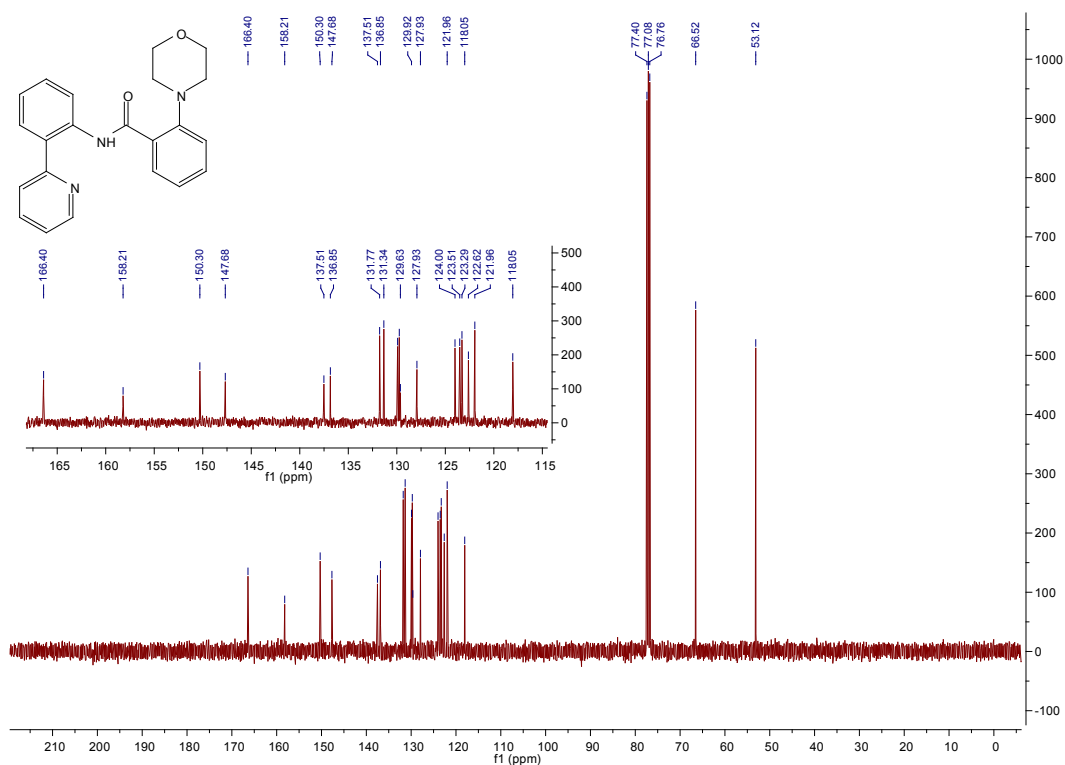

Fig. 26. <sup>13</sup>C NMR of 2a

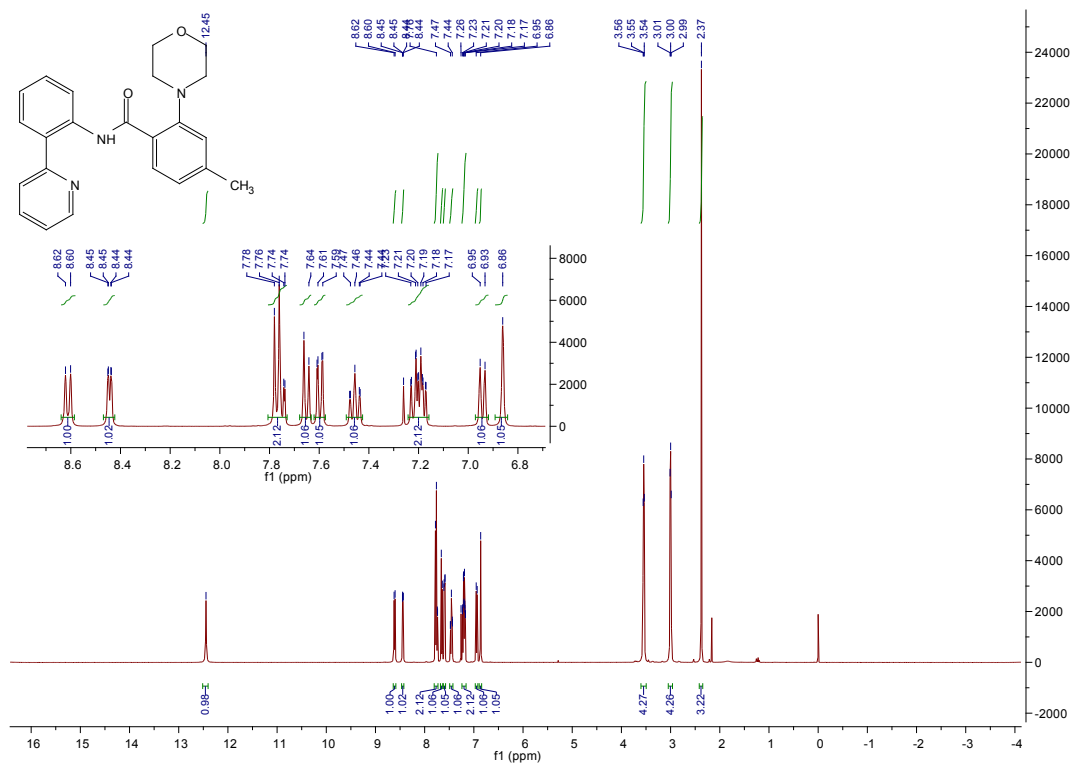

Fig. 27. <sup>1</sup>H NMR of **2b**

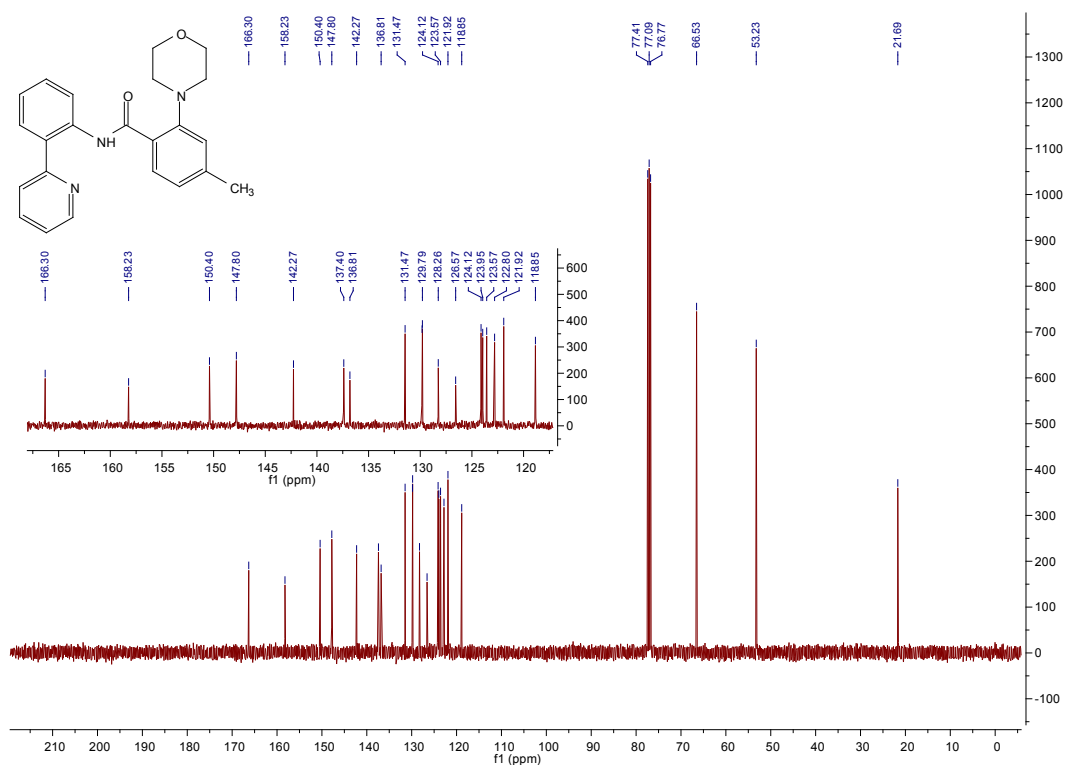

Fig. 28. <sup>13</sup>C NMR of **2b**

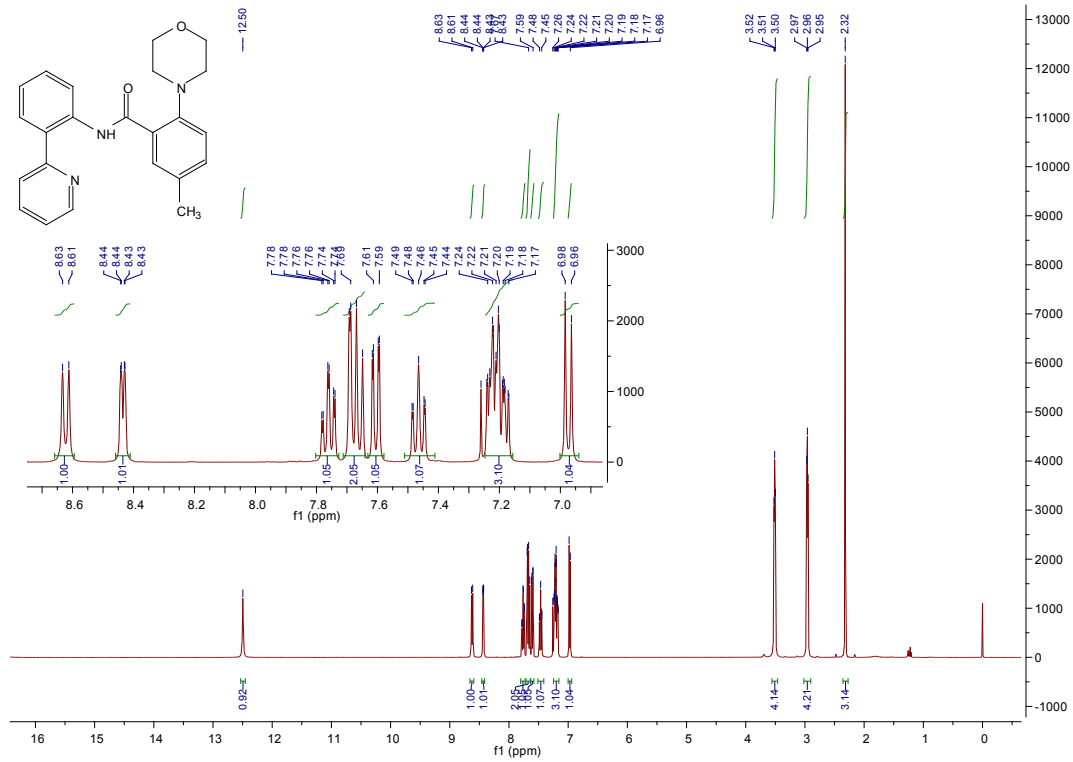

Fig. 29. <sup>1</sup>H NMR of 2c

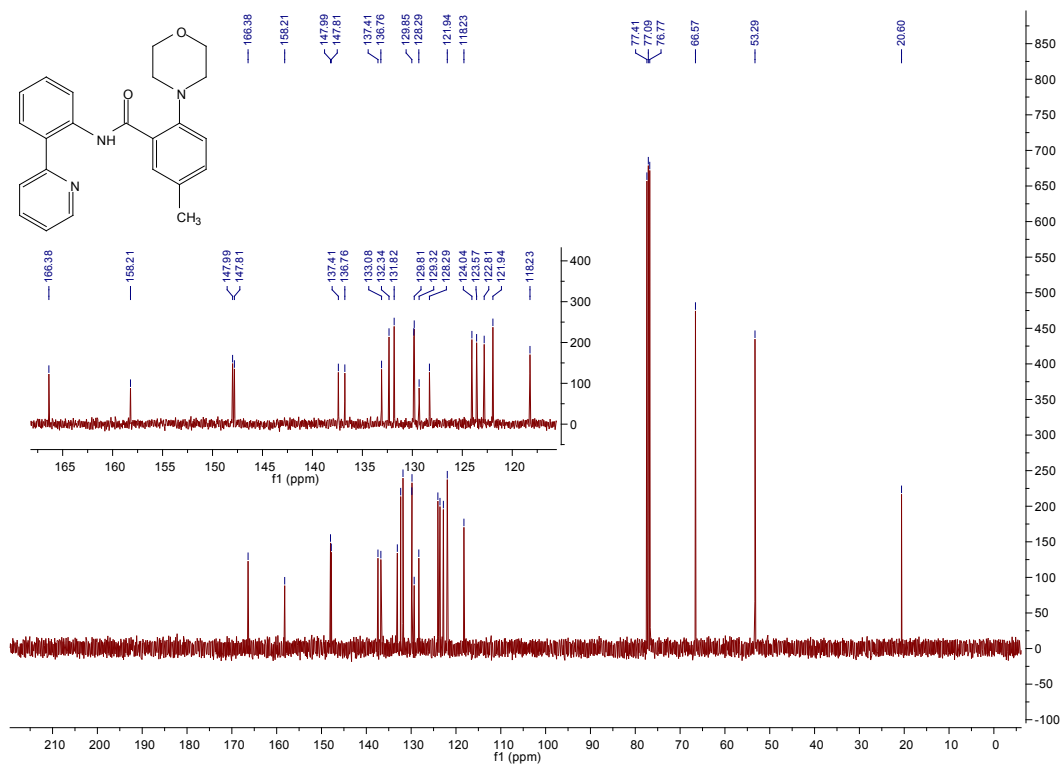

Fig. 30. <sup>13</sup>C NMR of 2c

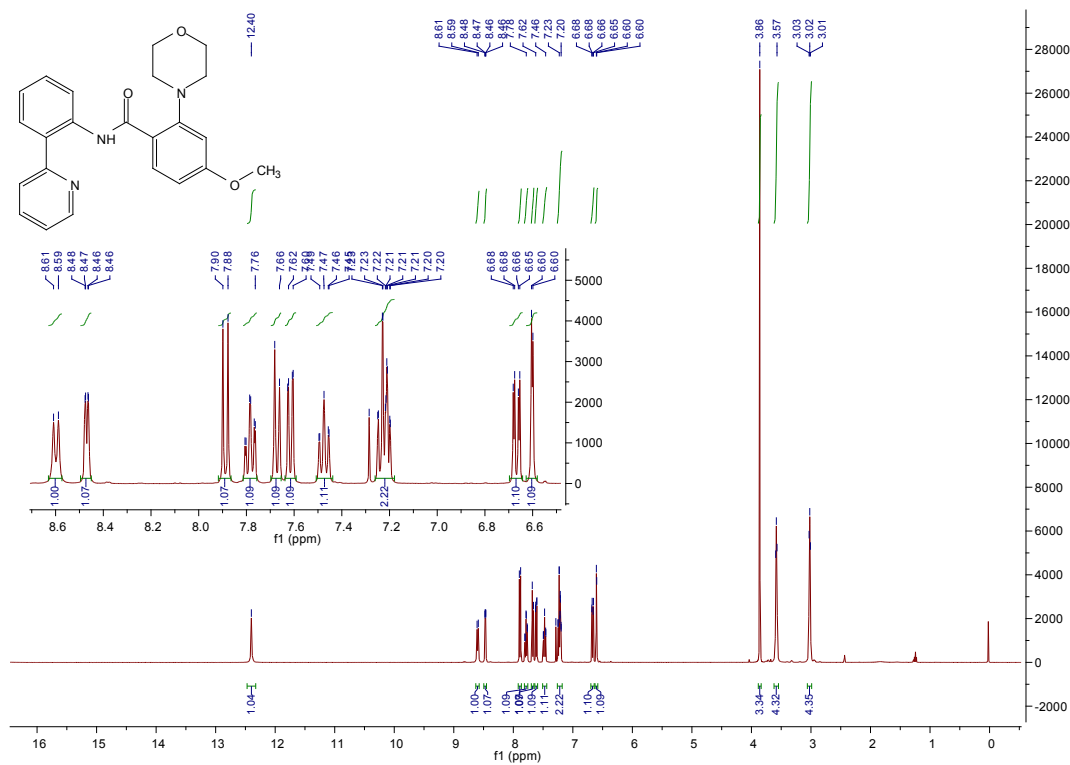

Fig. 31. <sup>1</sup>H NMR of 2d

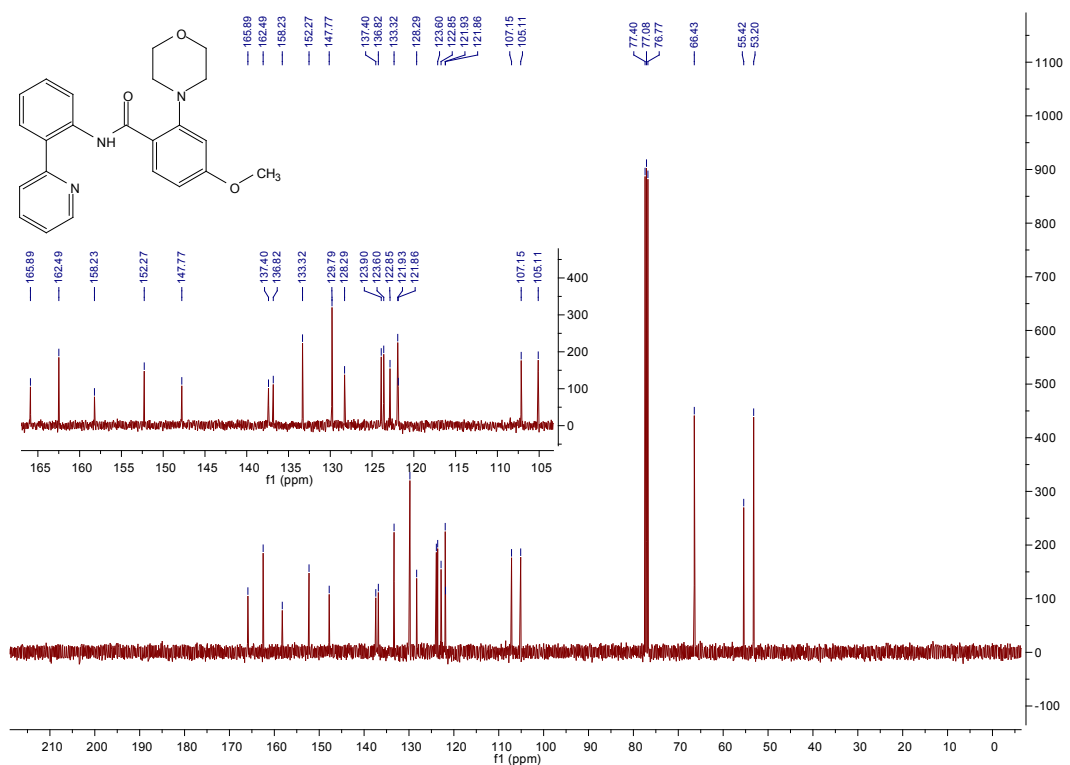

Fig. 32. <sup>13</sup>C NMR of 2d



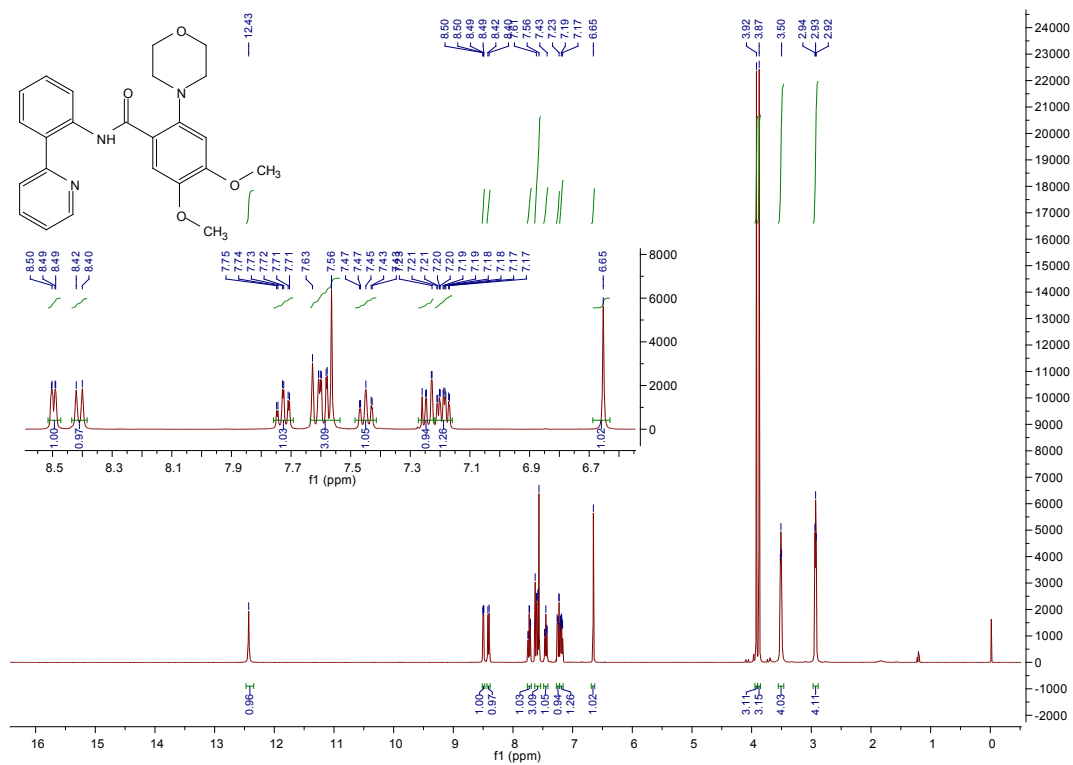

Fig. 33. <sup>1</sup>H NMR of **2e**

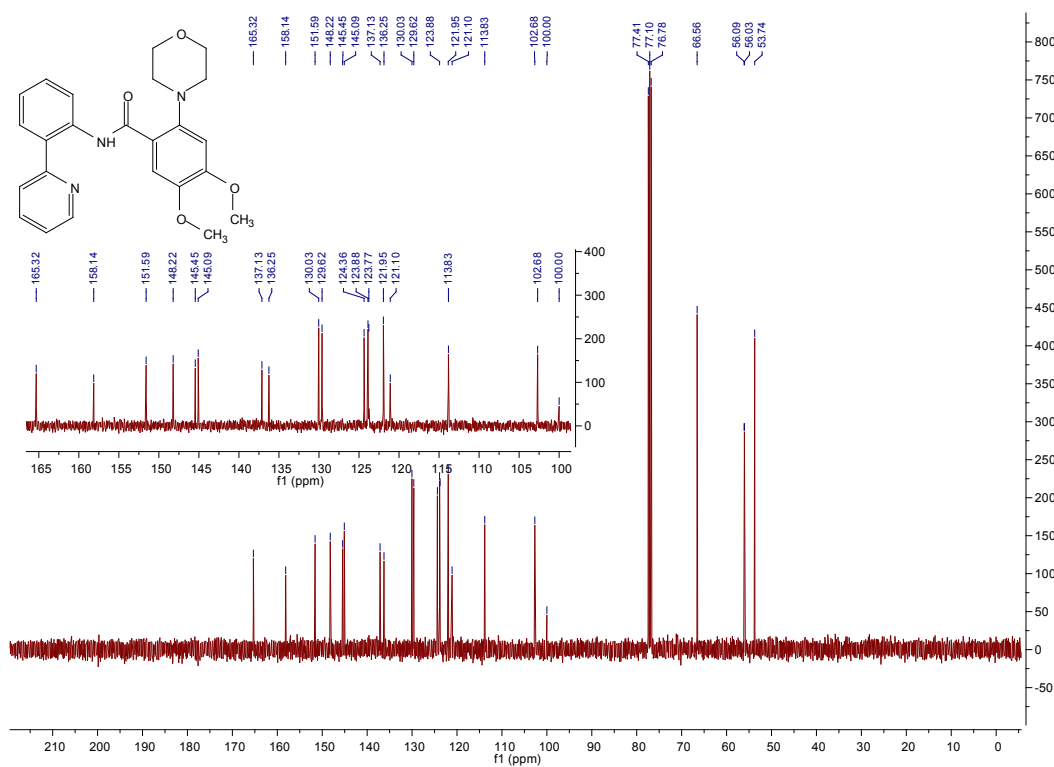

Fig. 34. <sup>13</sup>C NMR of **2e**

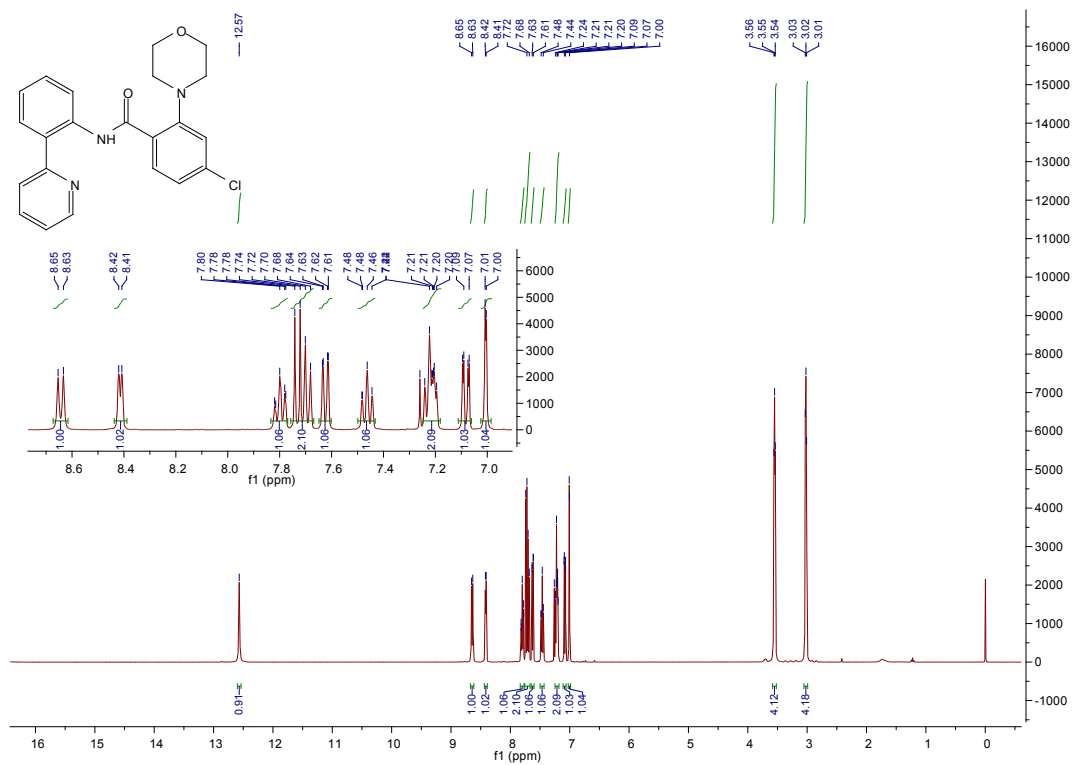

Fig. 35.  $^1\text{H}$  NMR of **2f**

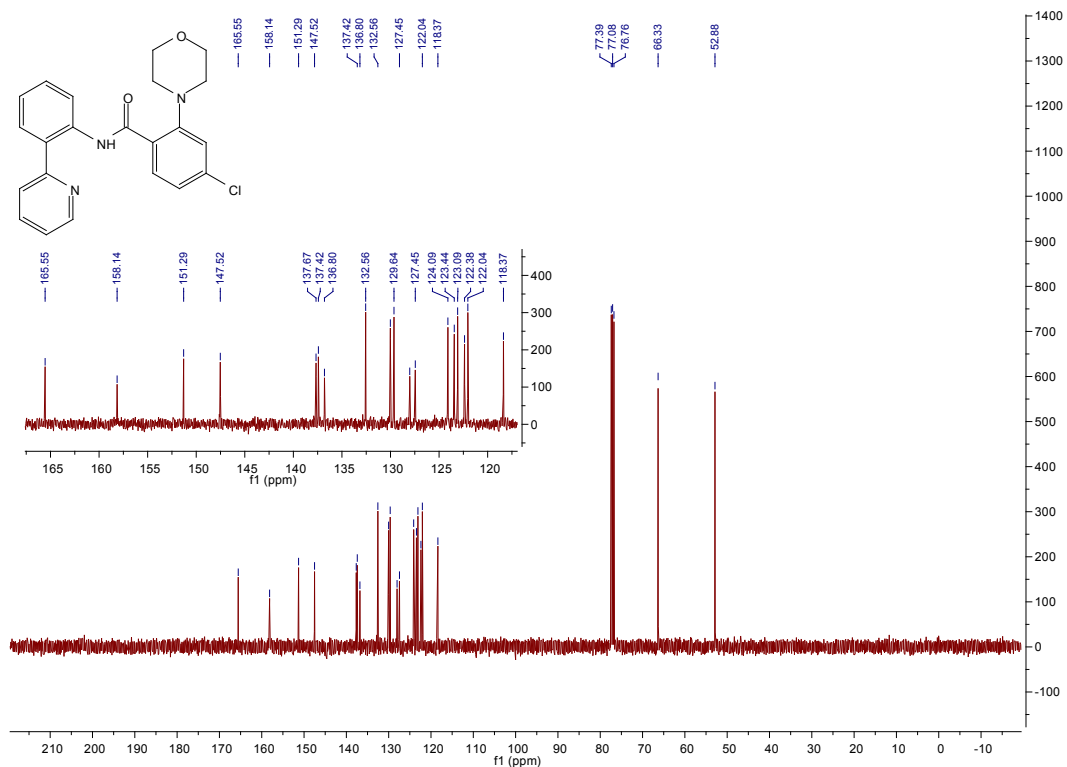

Fig. 36.  $^{13}\text{C}$  NMR of **2f**

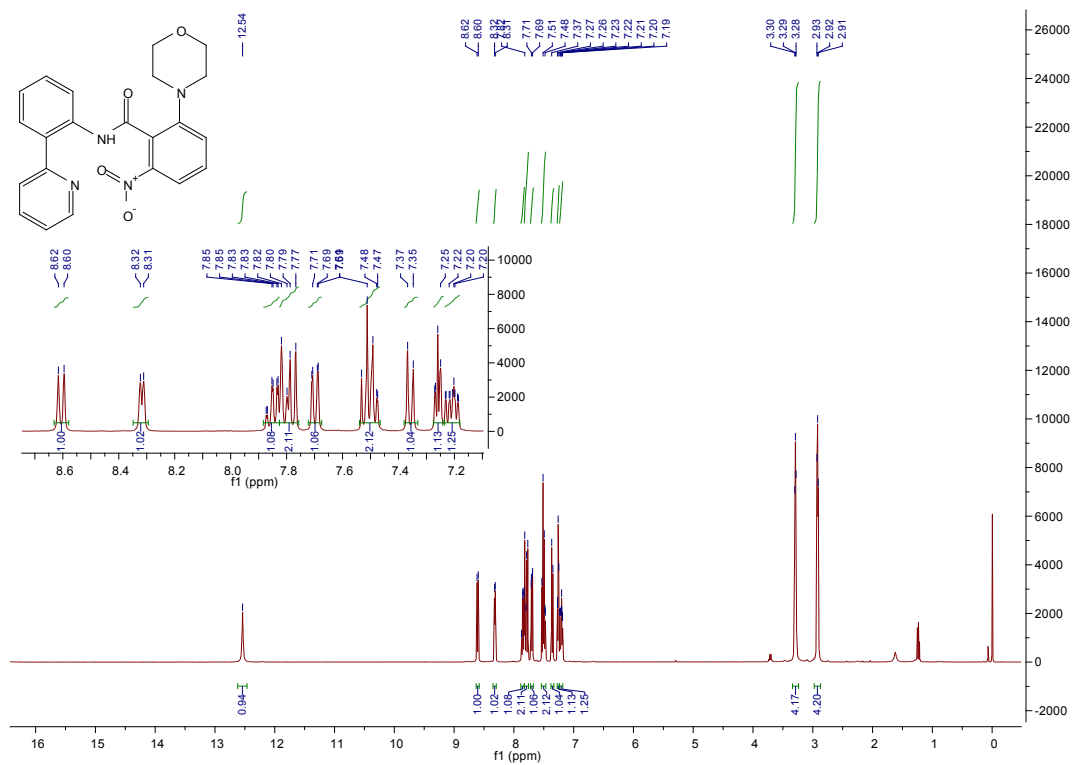

Fig. 37.  $^1\text{H}$  NMR of **2g**

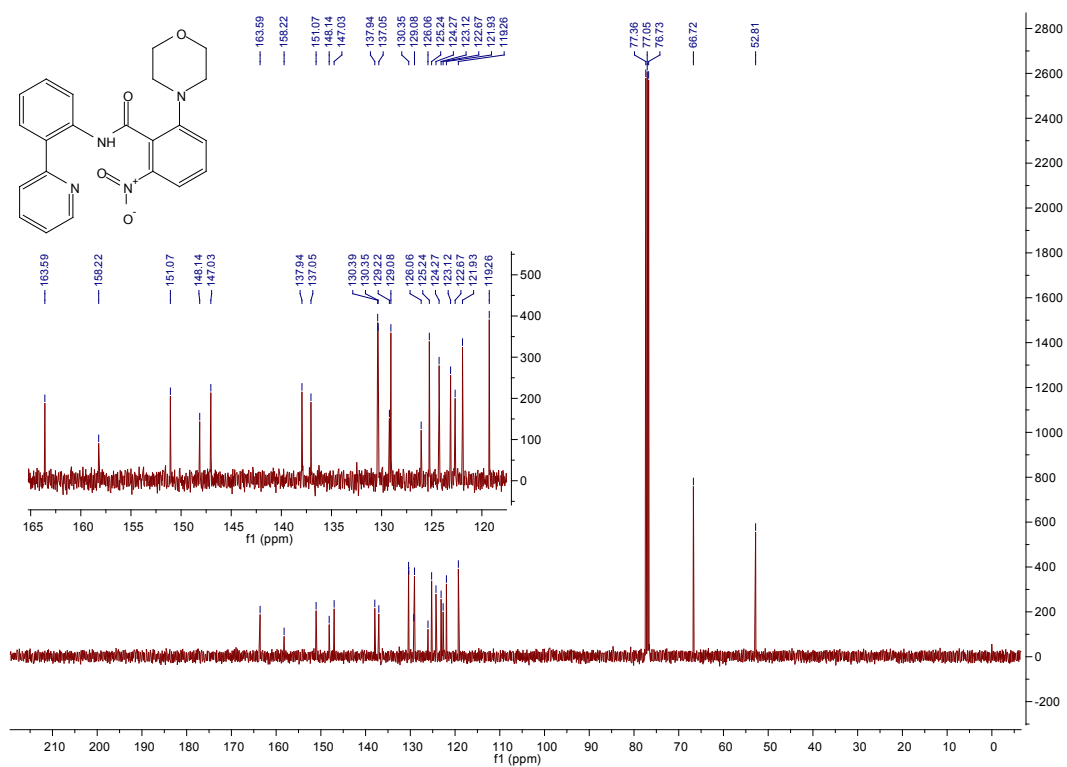

Fig. 38.  $^{13}\text{C}$  NMR of **2g**

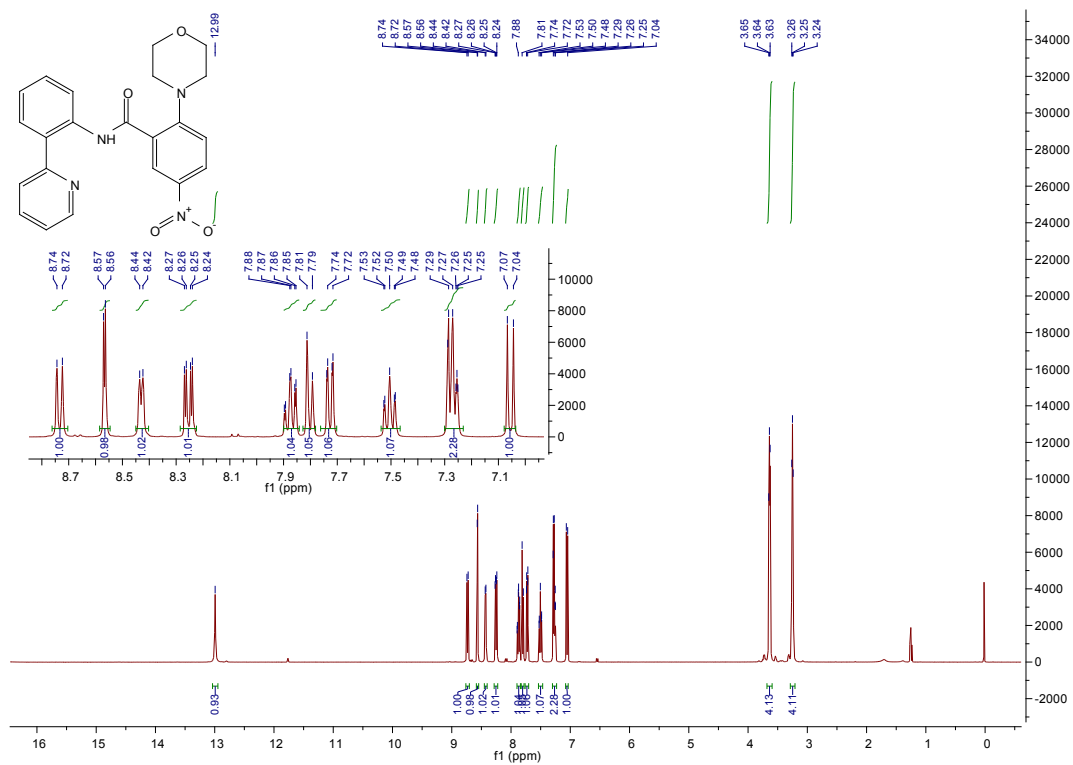

Fig. 39. <sup>1</sup>H NMR of 2h

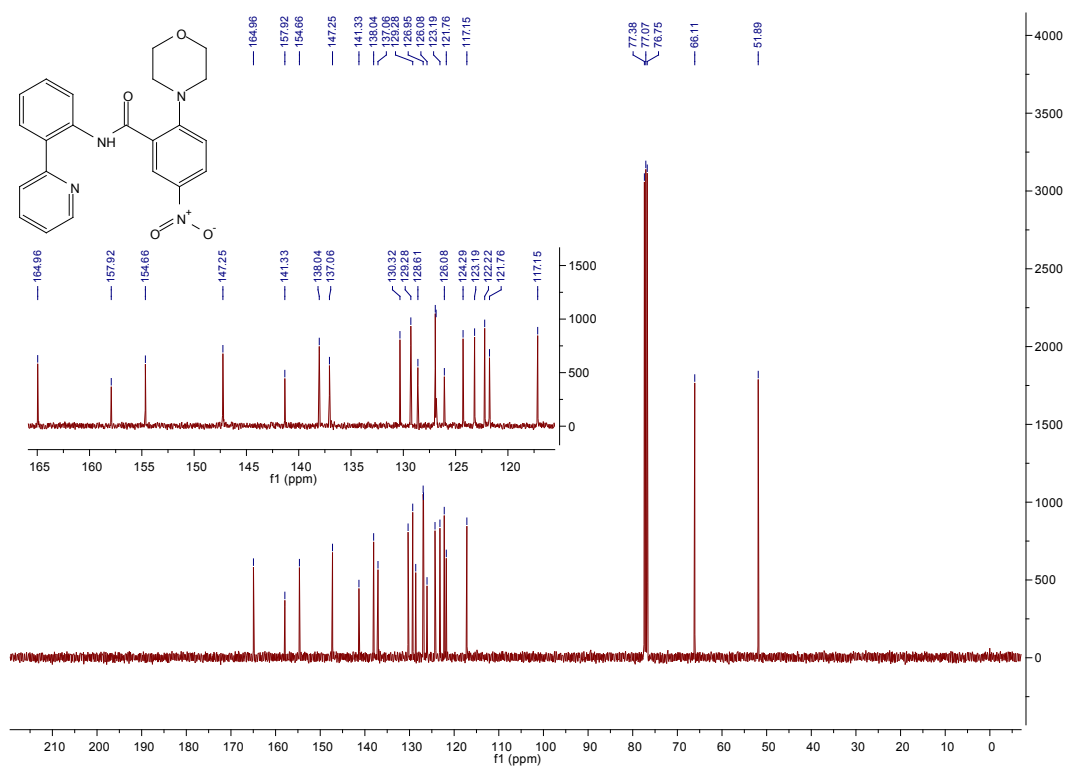

Fig. 40. <sup>13</sup>C NMR of 2h

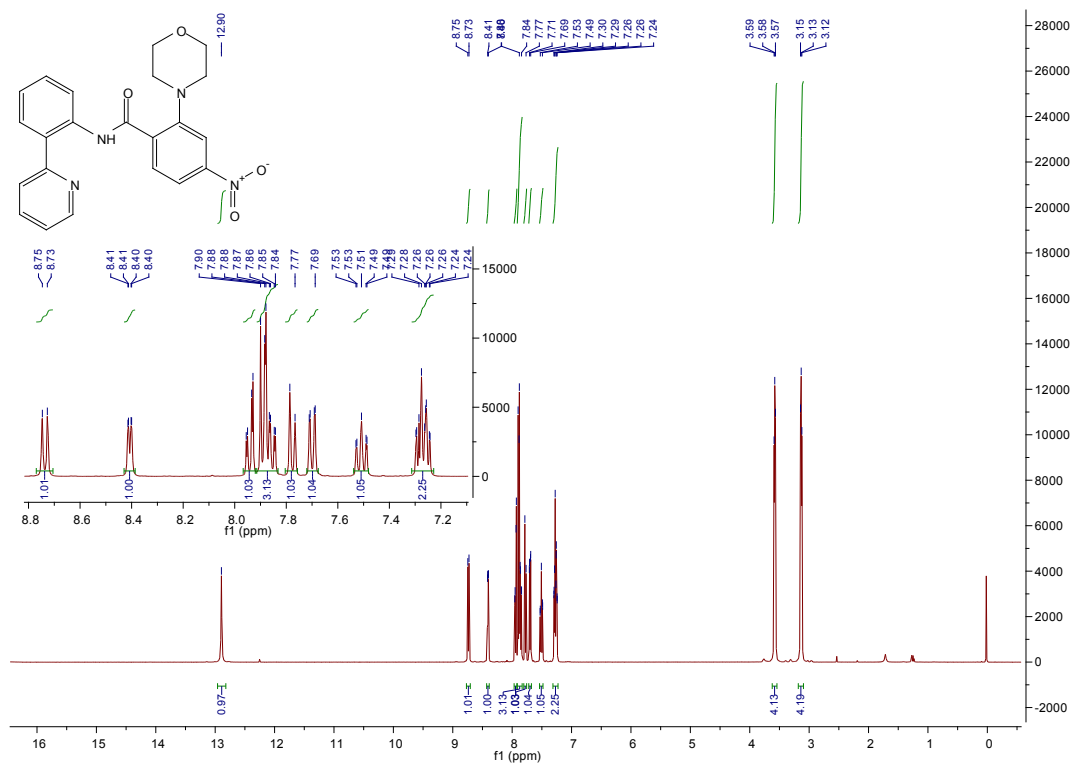

Fig. 41. <sup>1</sup>H NMR of 2i

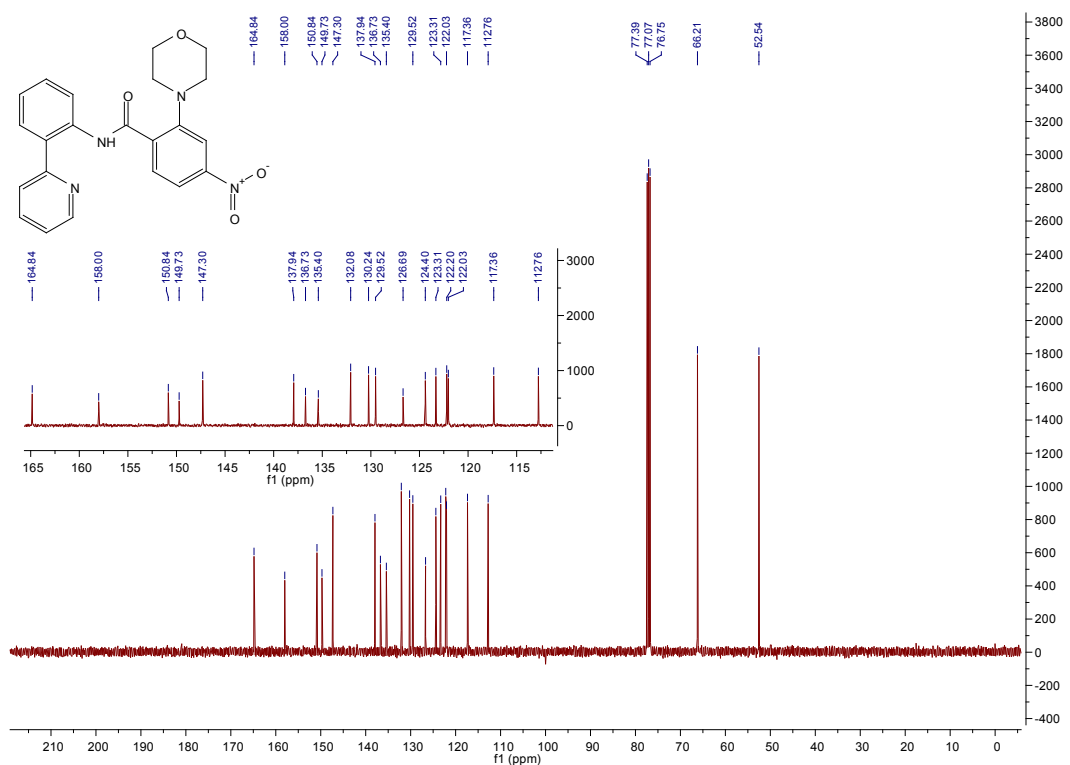

Fig. 42. <sup>13</sup>C NMR of 2i

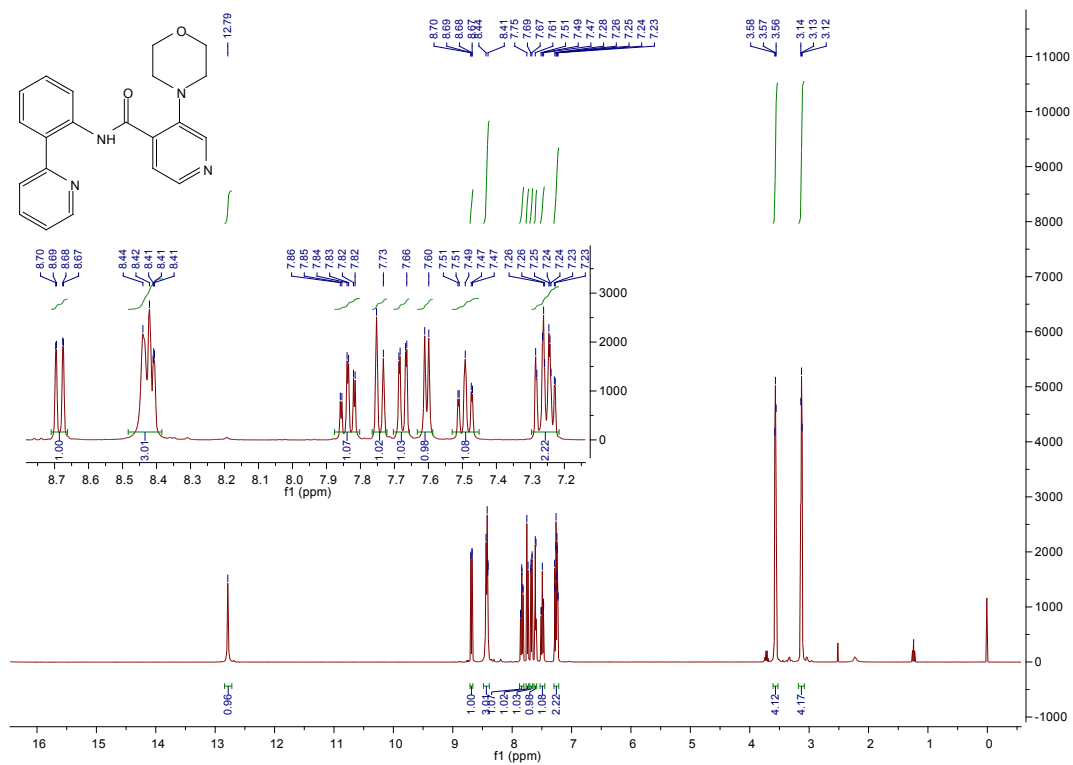

Fig. 43. <sup>1</sup>H NMR of 2j

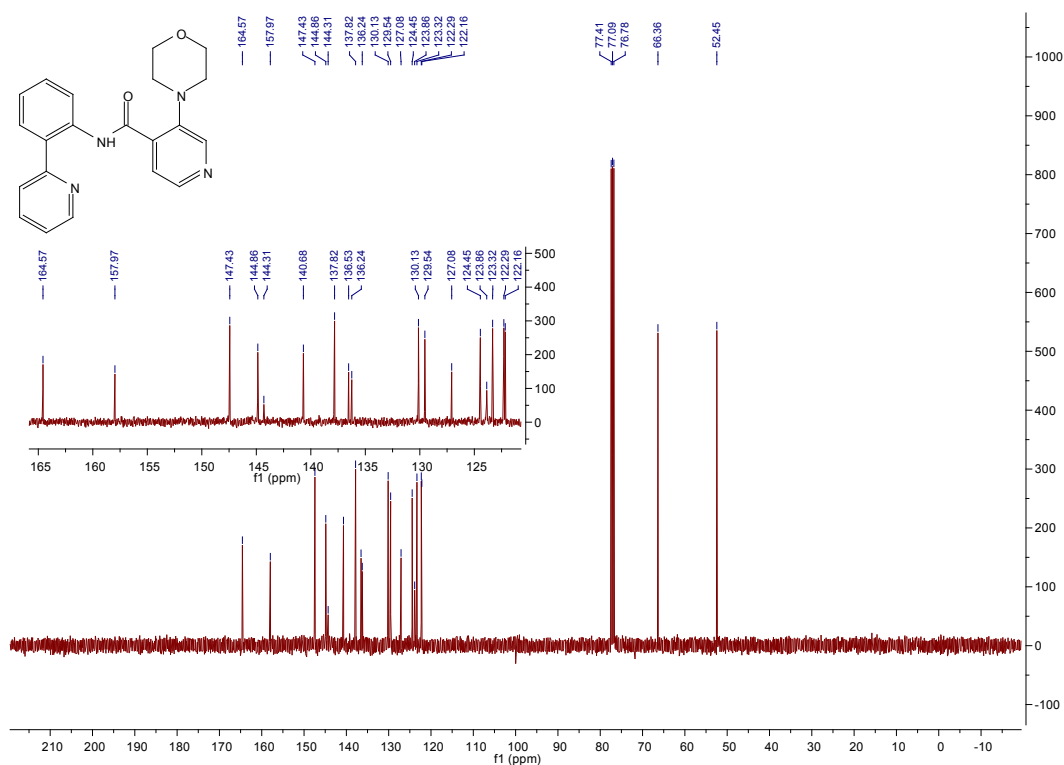

Fig. 44. <sup>13</sup>C NMR of 2j

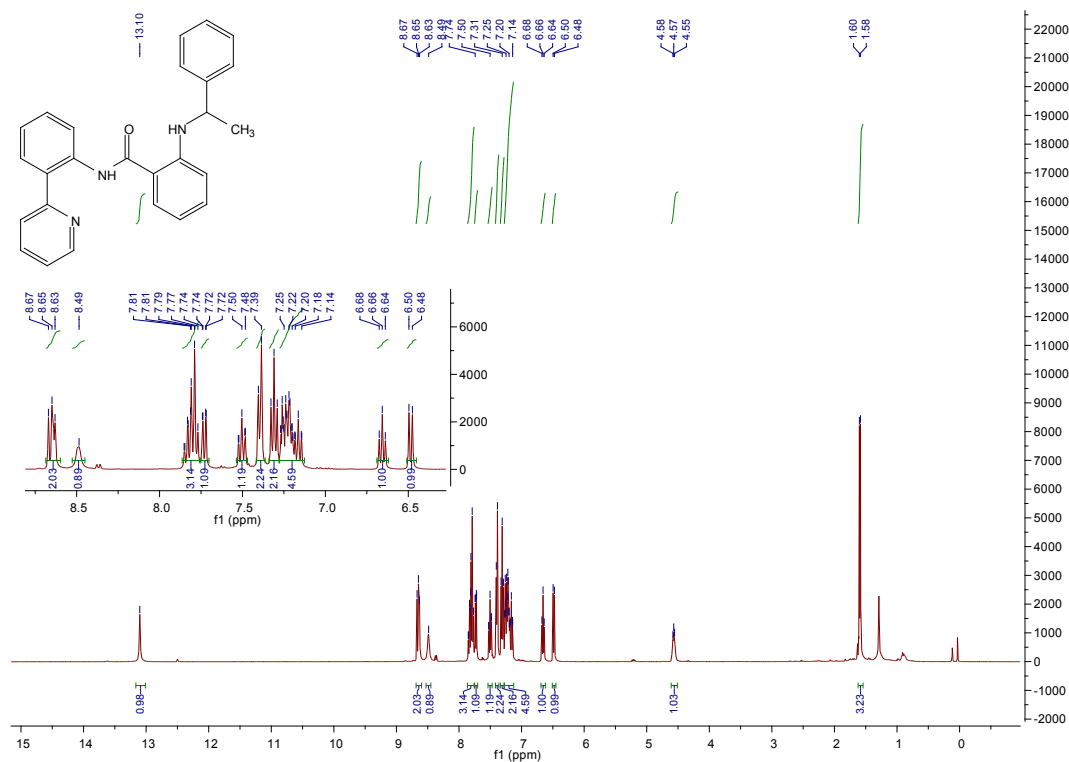

Fig. 45.  $^1\text{H}$  NMR of **4a**

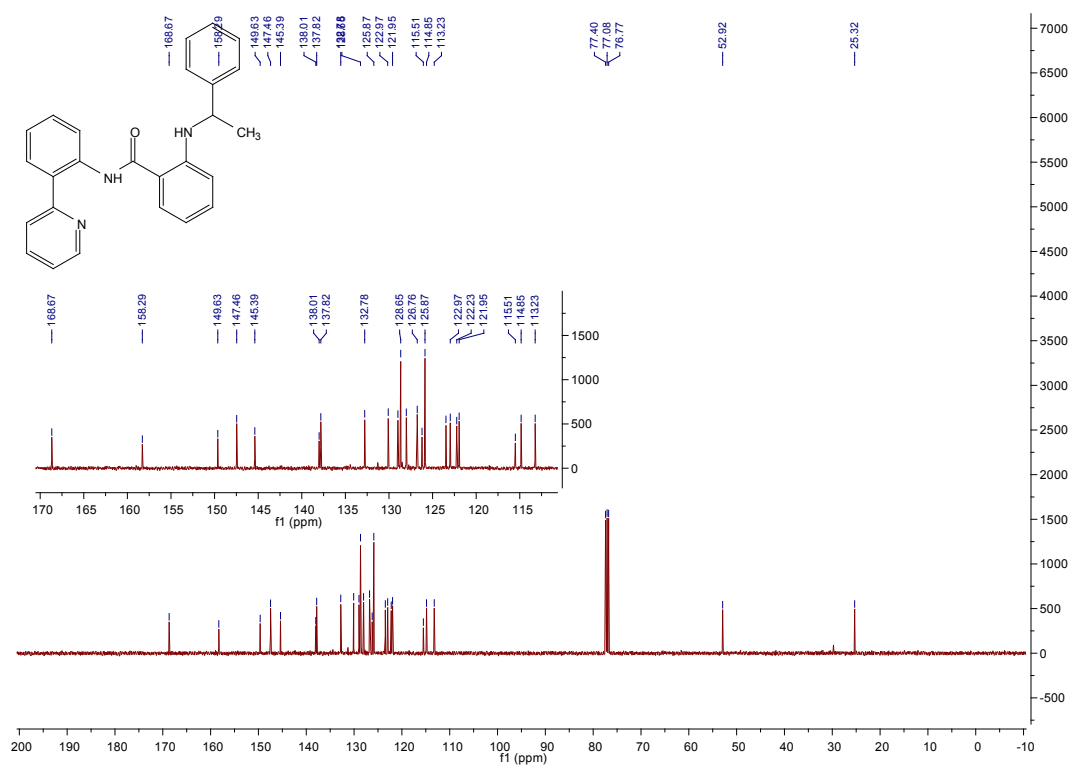

Fig. 46.  $^{13}\text{C}$  NMR of **4a**

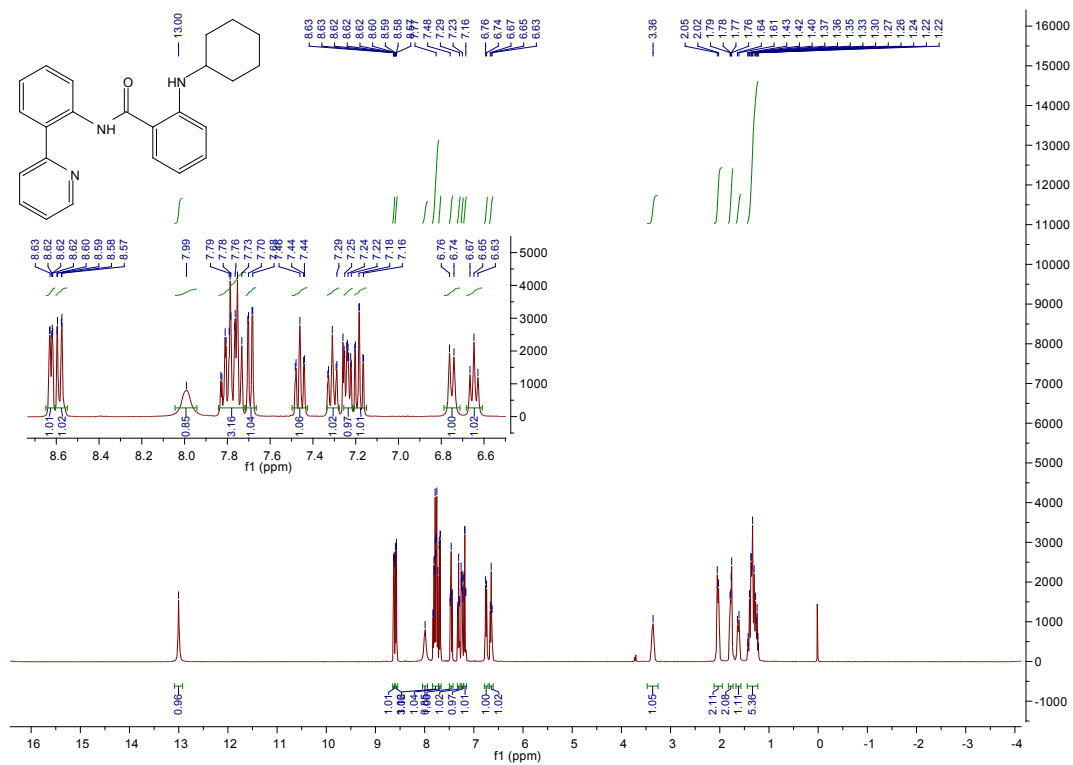

Fig. 47. <sup>1</sup>H NMR of 4b

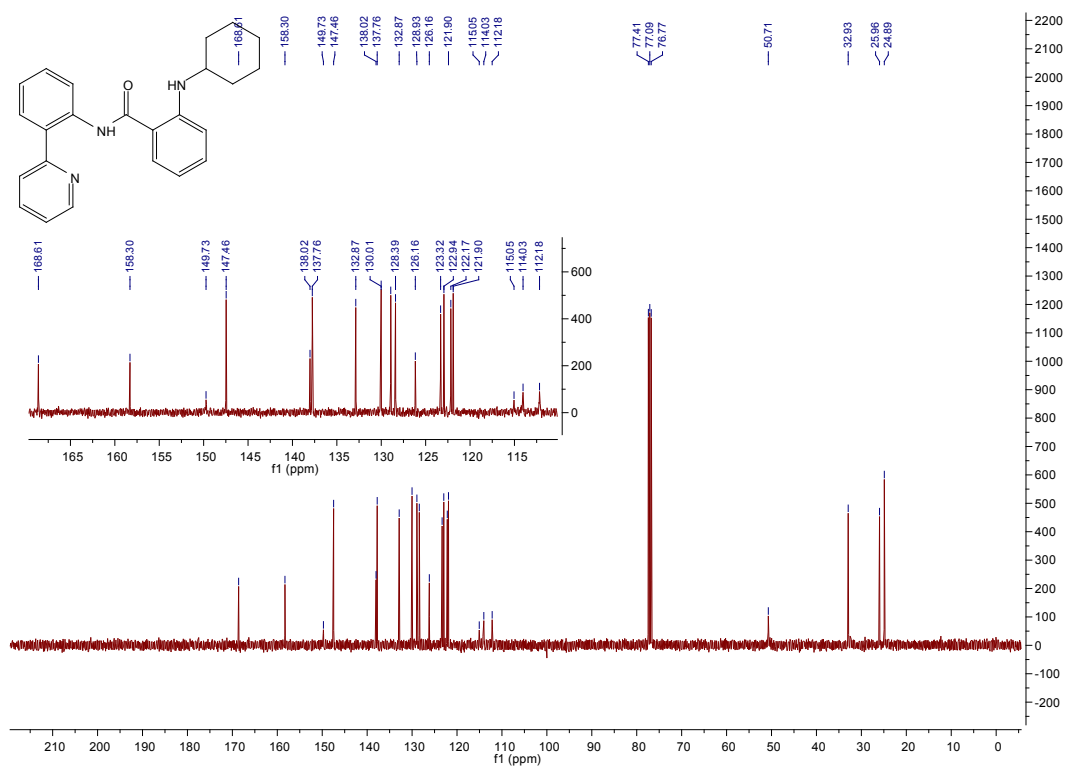

Fig. 48. <sup>13</sup>C NMR of 4b



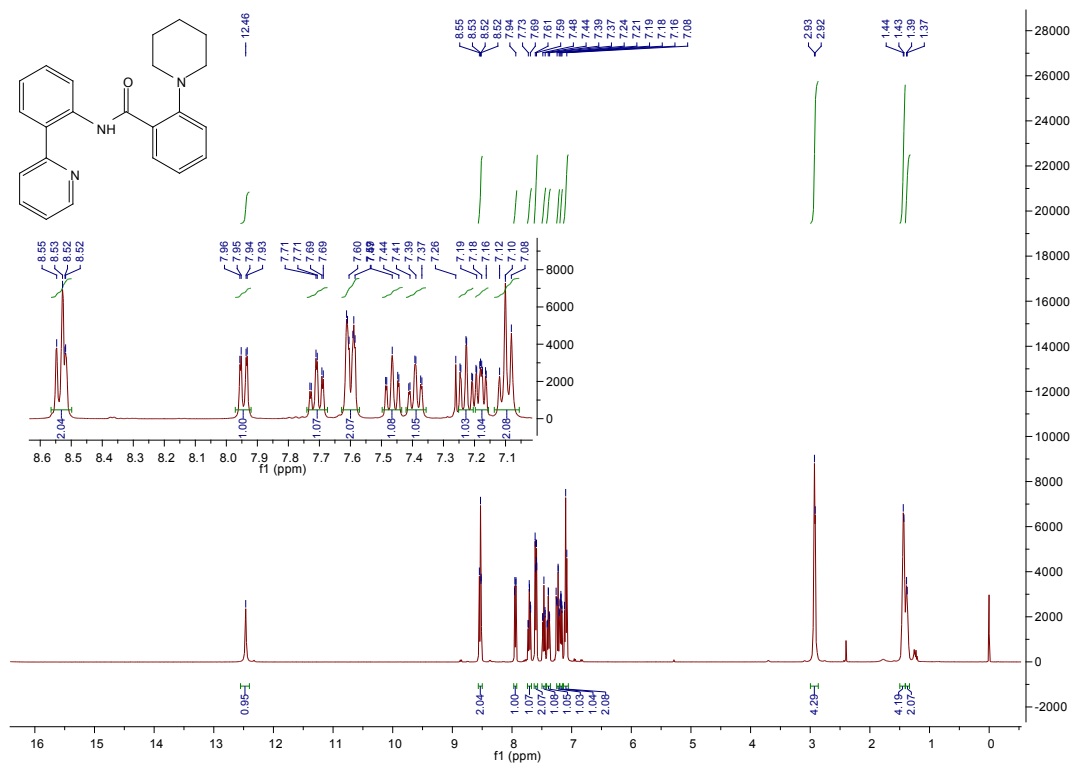

Fig. 49. <sup>1</sup>H NMR of 4c

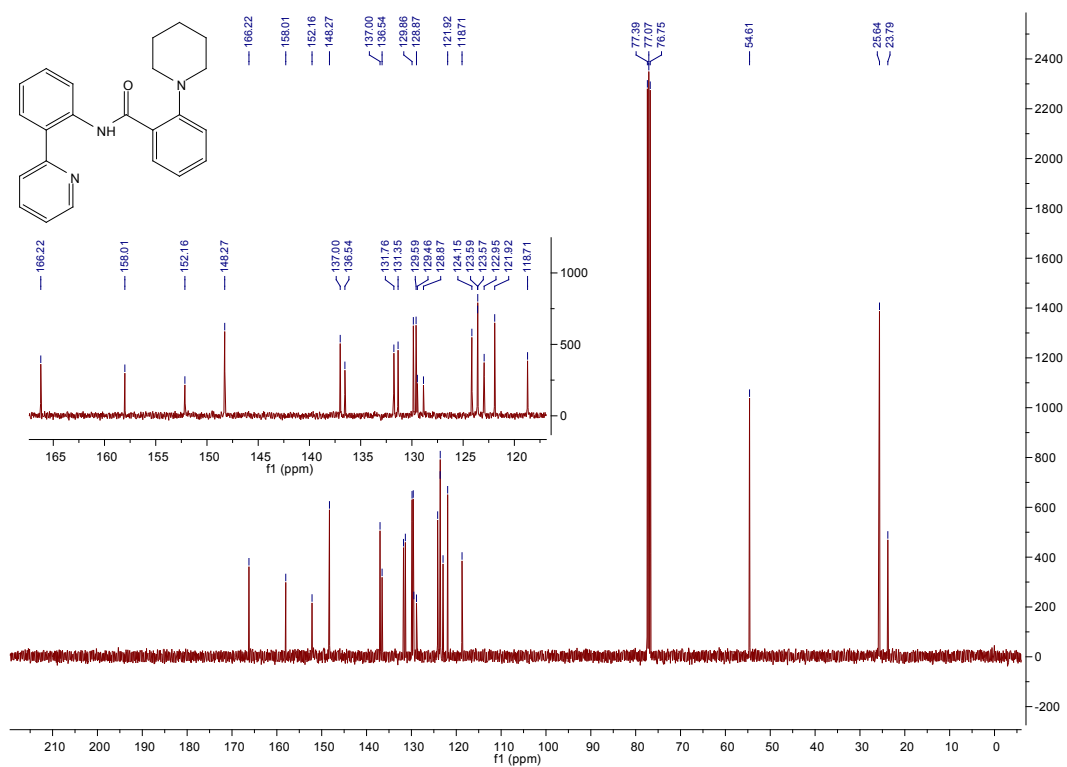

Fig. 50. <sup>13</sup>C NMR of 4c

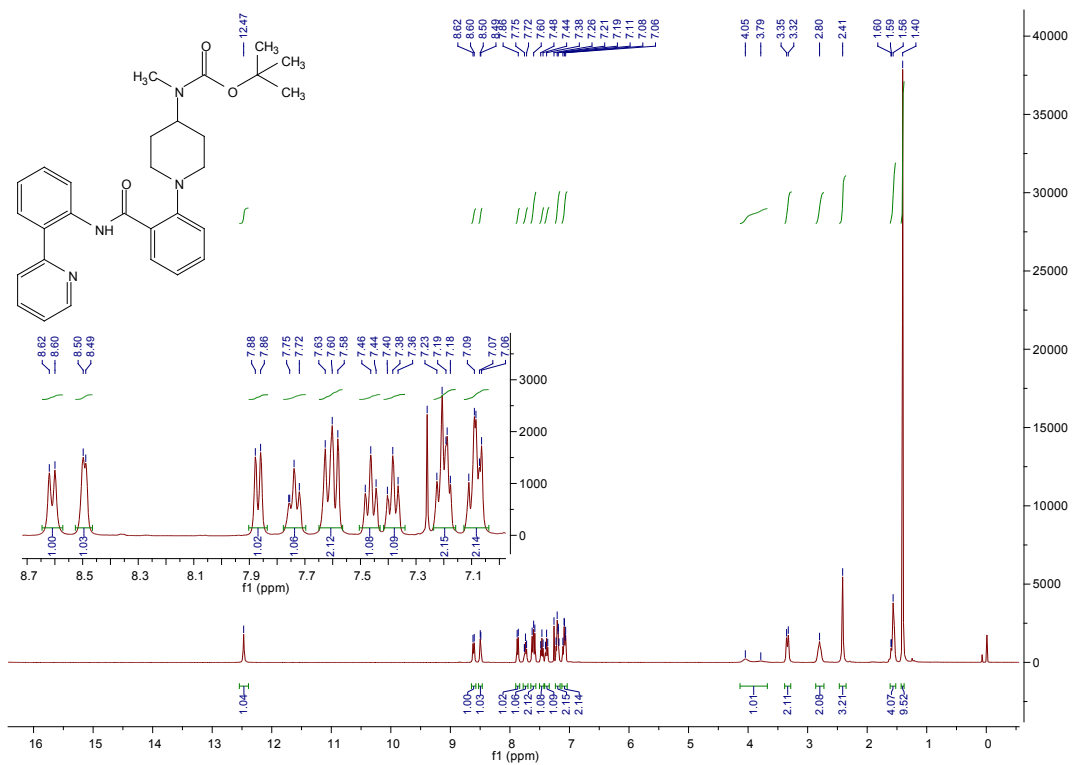

Fig. 51. <sup>1</sup>H NMR of 4d

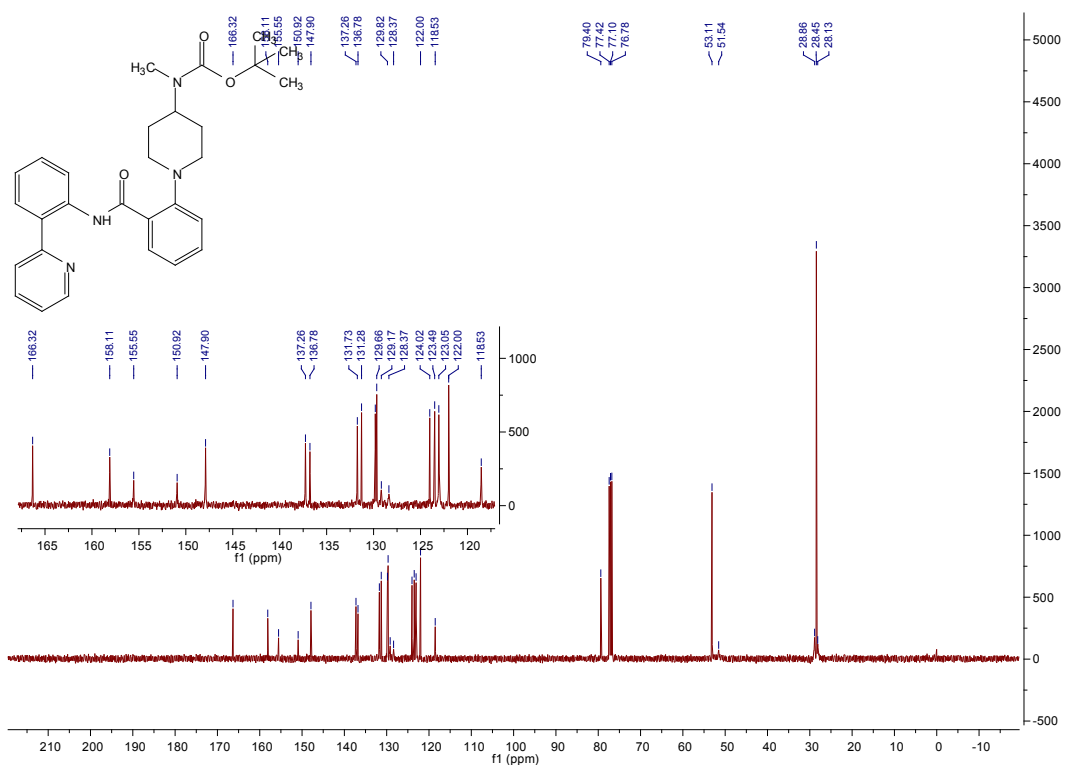

Fig. 52. <sup>13</sup>C NMR of 4d

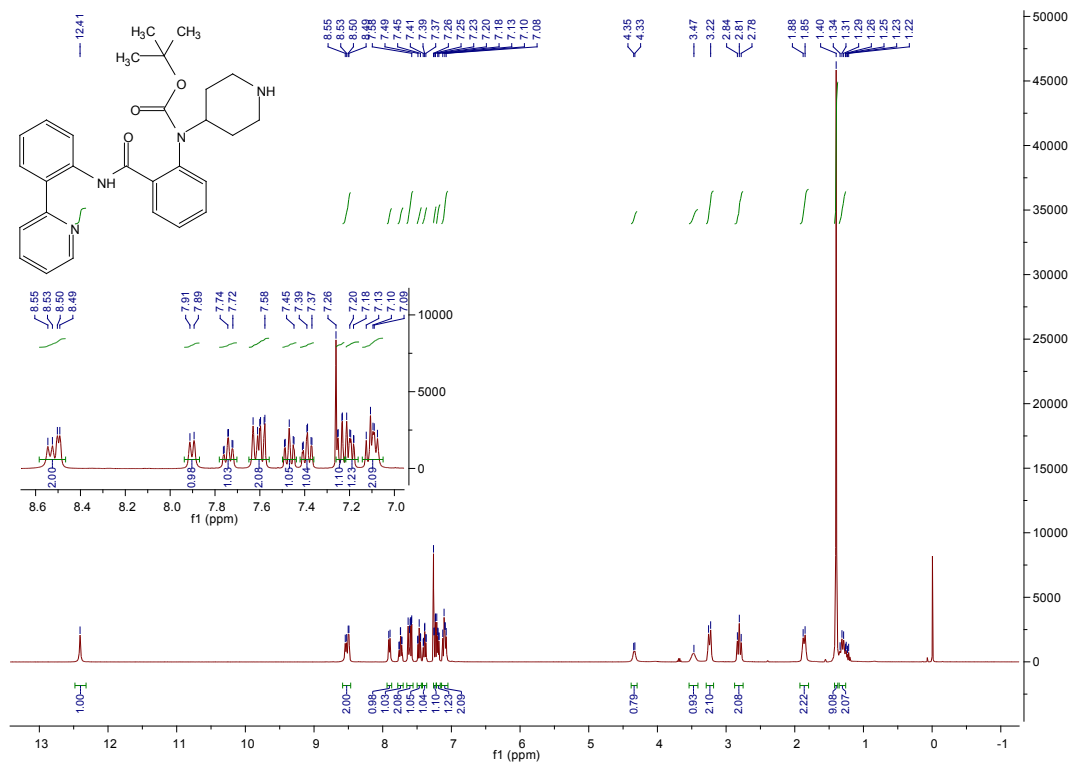

Fig. 53. <sup>1</sup>H NMR of 4e

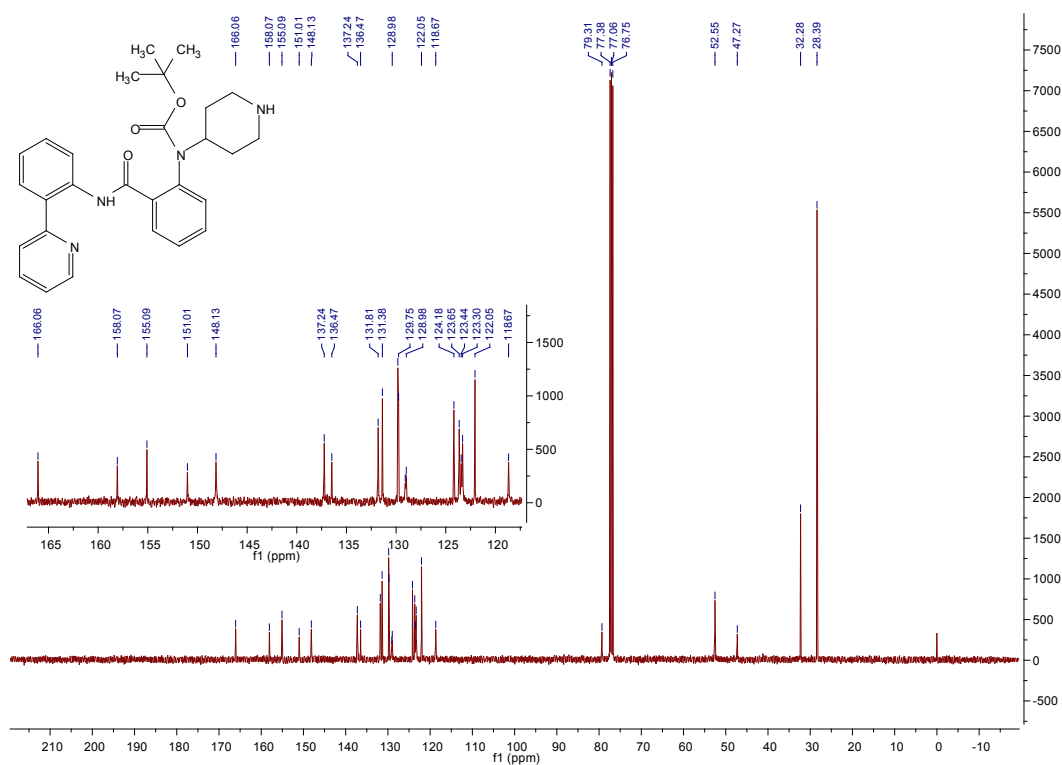

Fig. 54. <sup>13</sup>C NMR of 4e

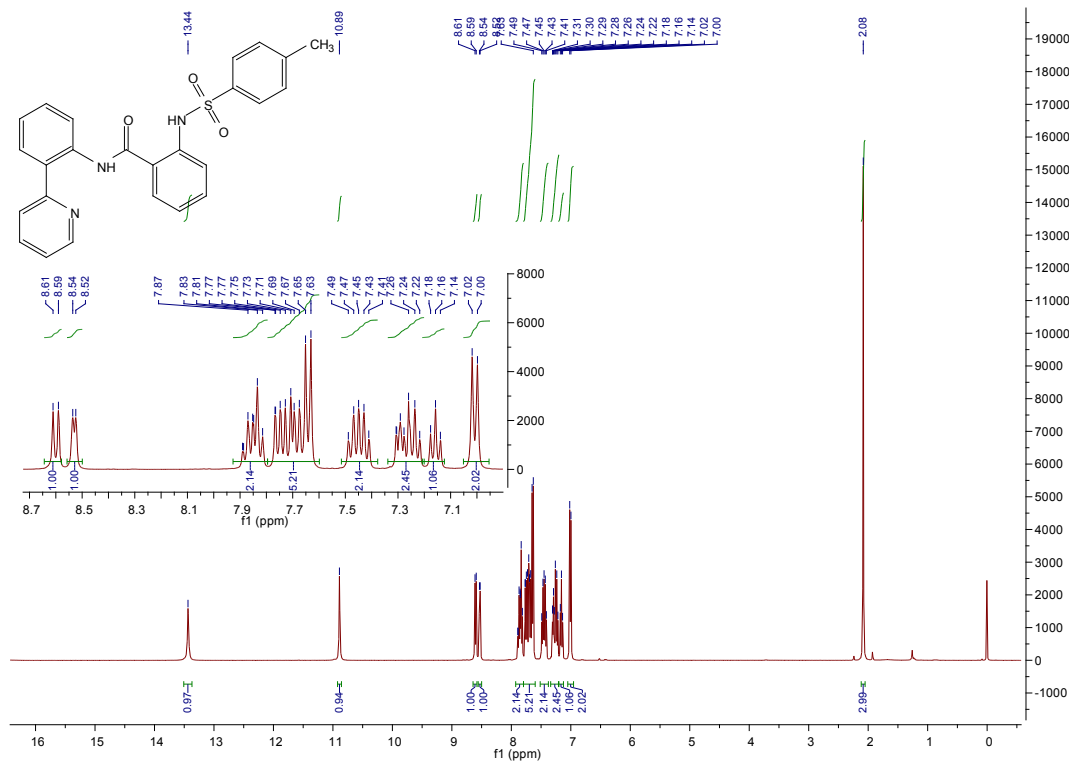

Fig.55. <sup>1</sup>H NMR of 4f

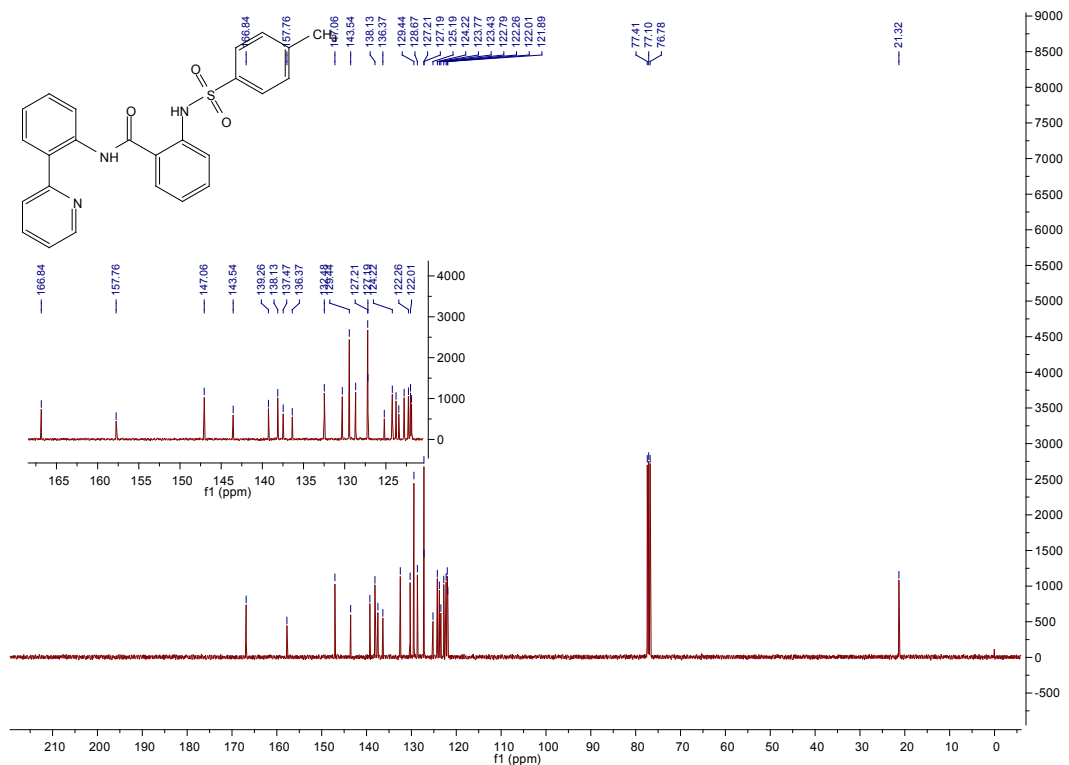

Fig. 56. <sup>13</sup>C NMR of 4f

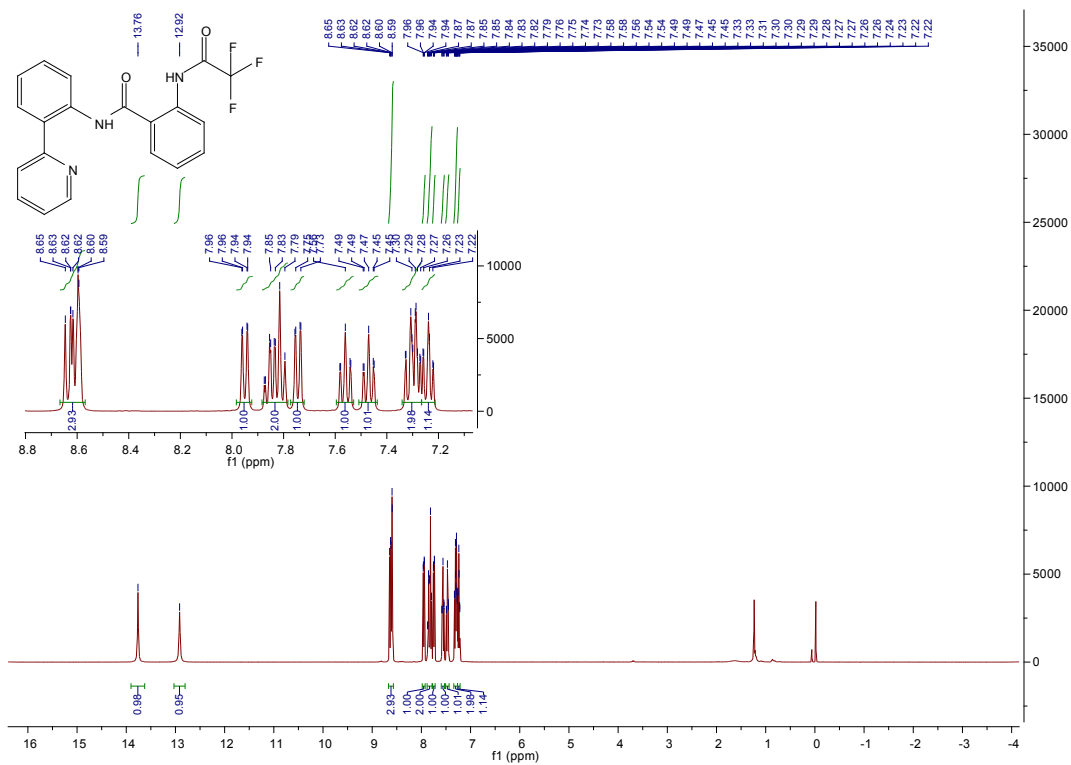

Fig. 57. <sup>1</sup>H NMR of 4g

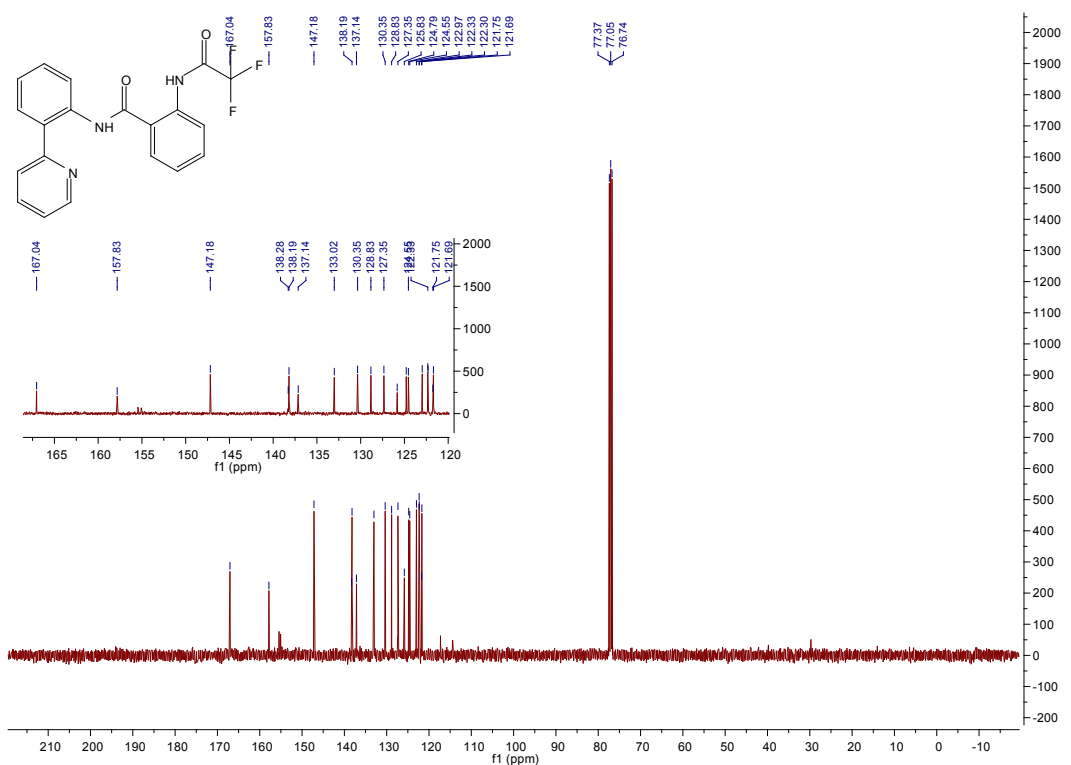

Fig. 58. <sup>13</sup>C NMR of 4g

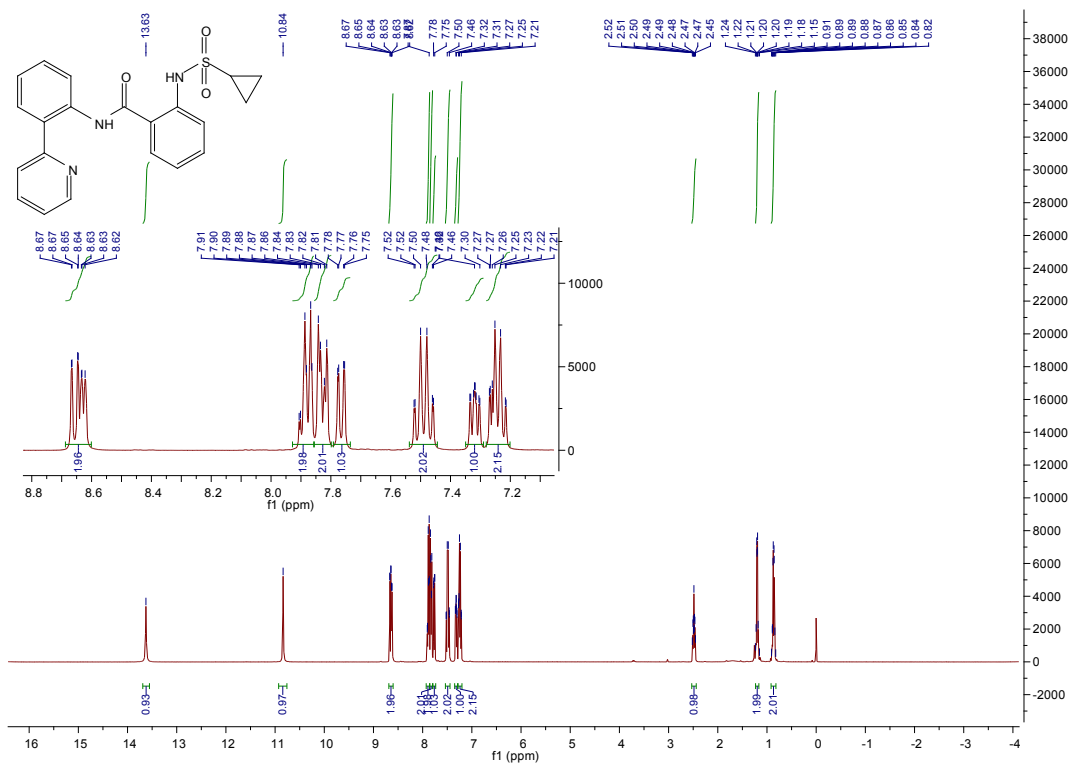

Fig. 59. <sup>1</sup>H NMR of 4h

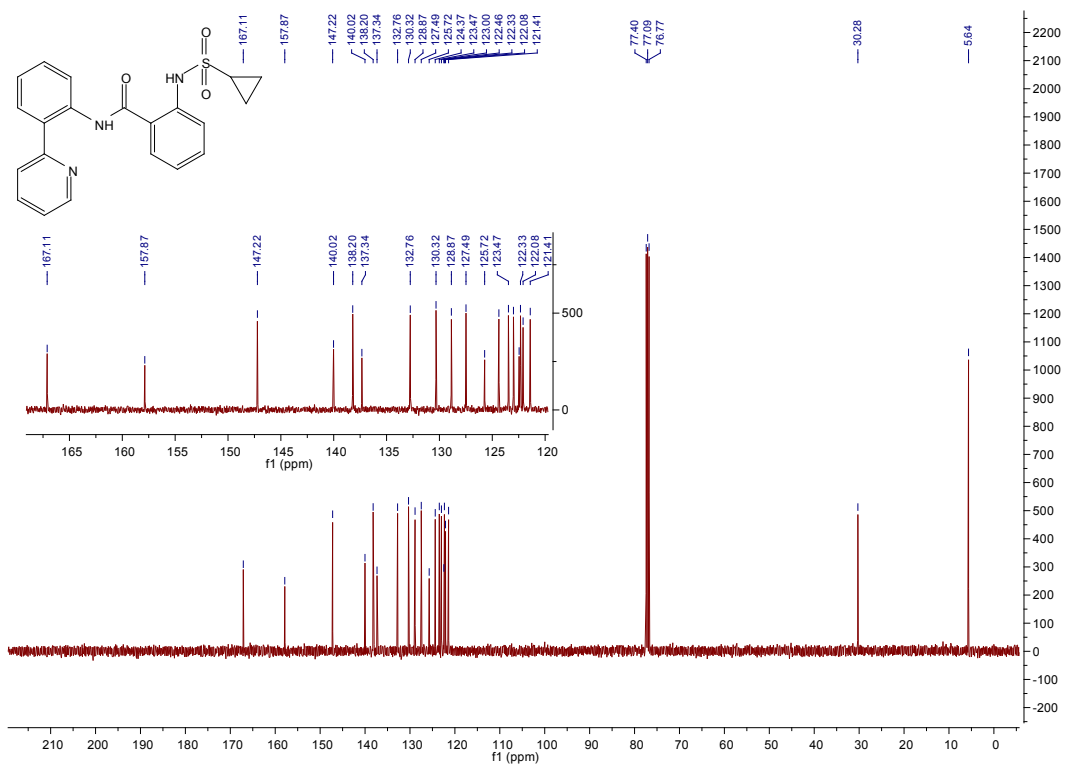

Fig. 60. <sup>13</sup>C NMR of 4h

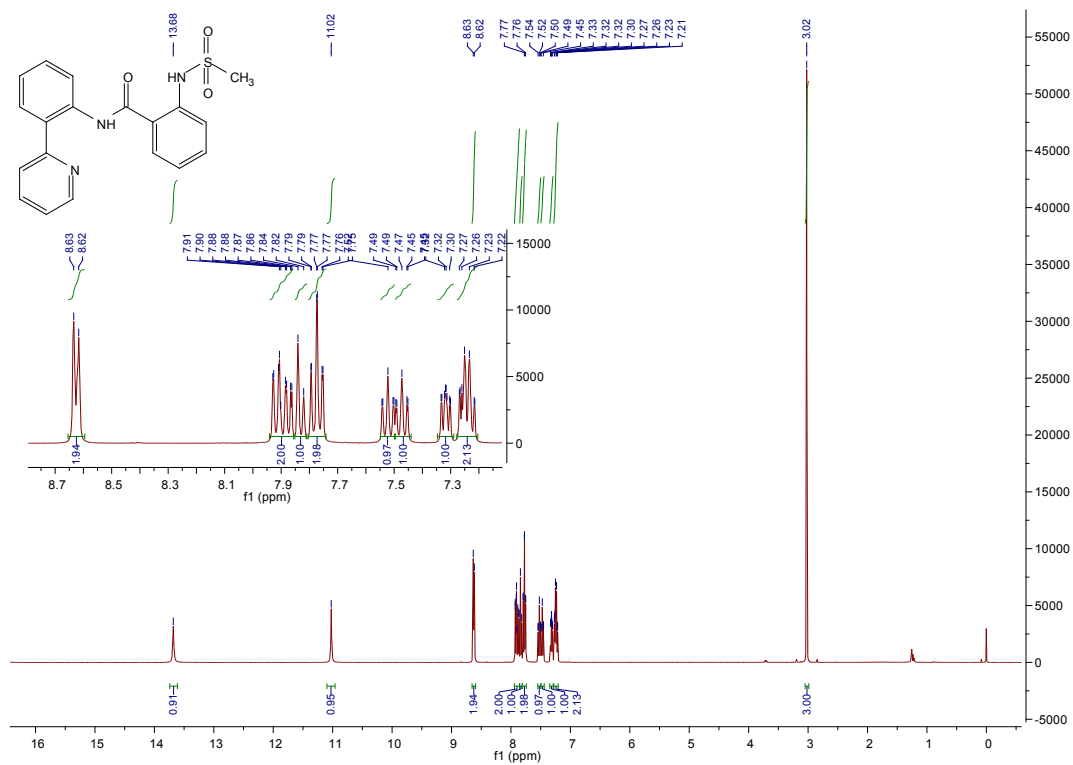

Fig. 61. <sup>1</sup>H NMR of 4i

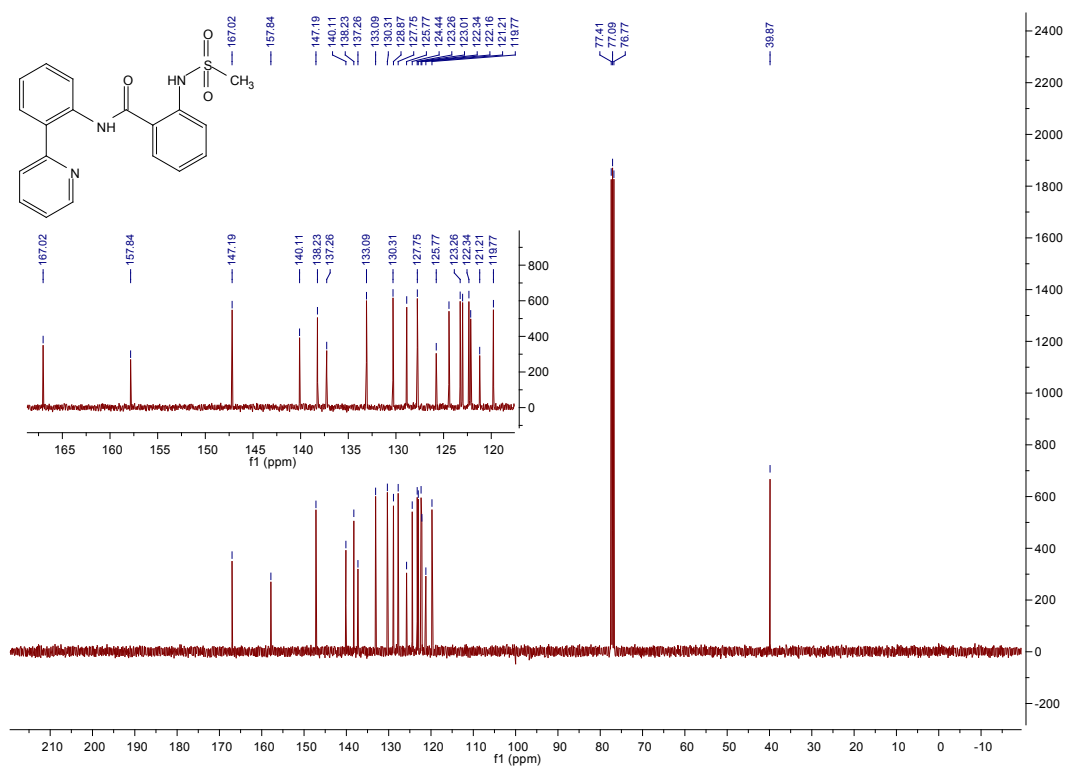

Fig. 62. <sup>13</sup>C NMR of 4i

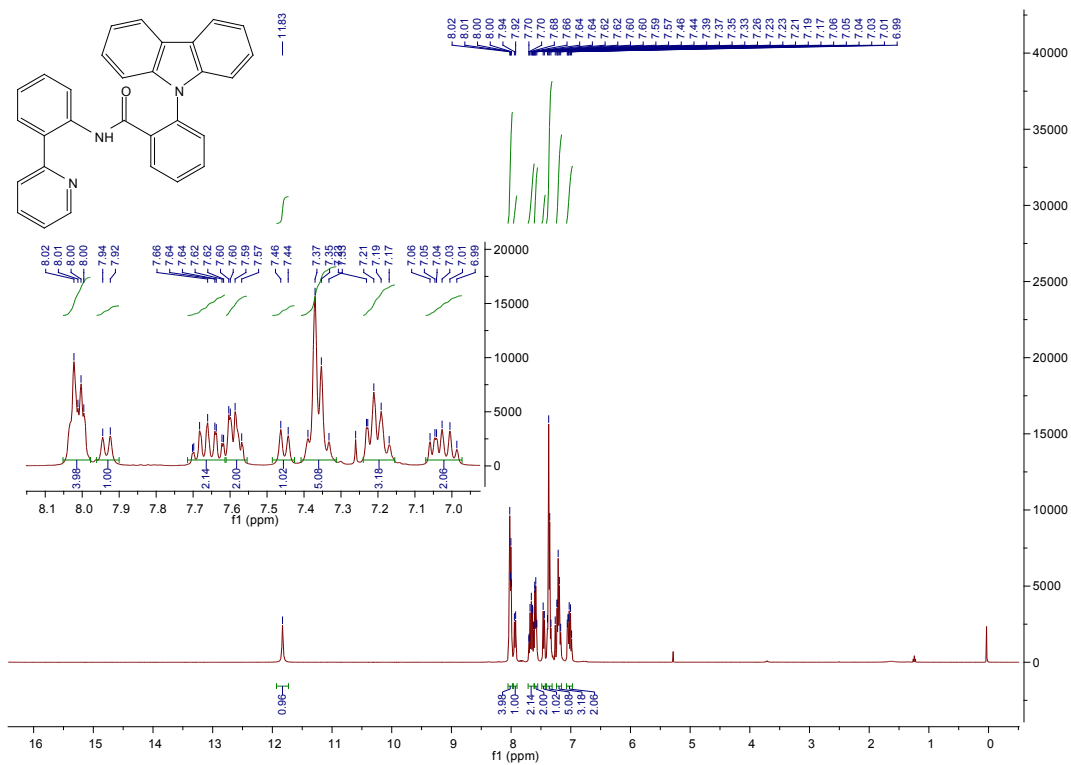

Fig. 63. <sup>1</sup>H NMR of 4j

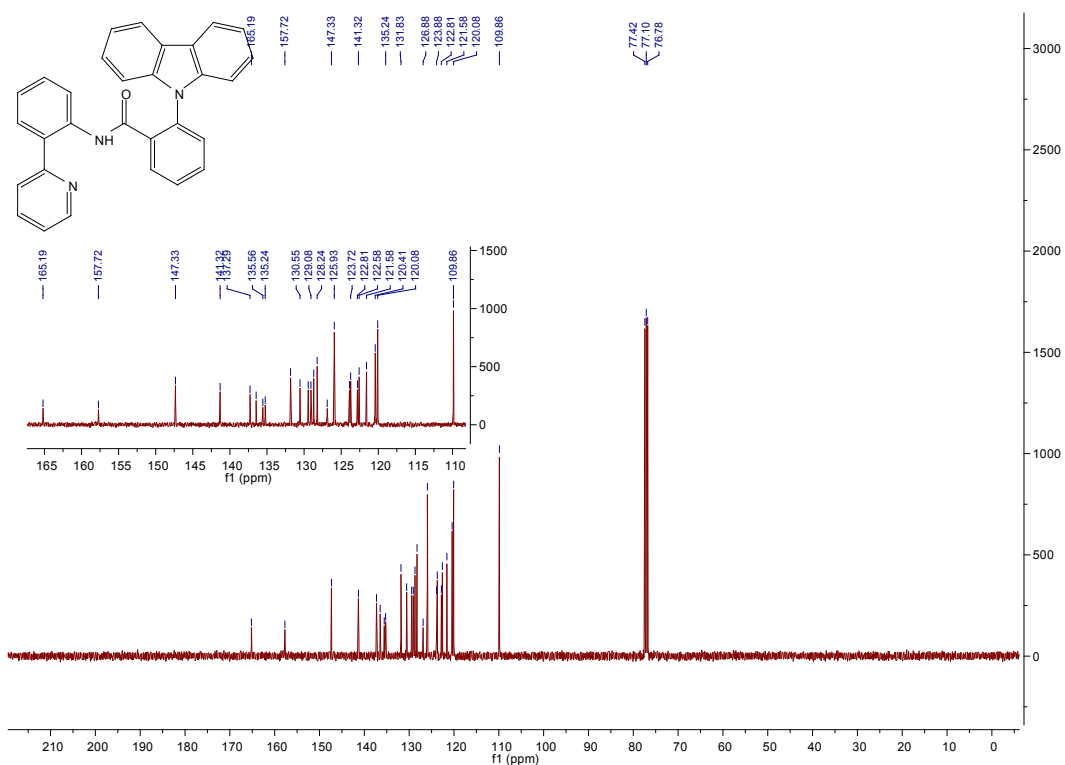

Fig. 64. <sup>13</sup>C NMR of 4j



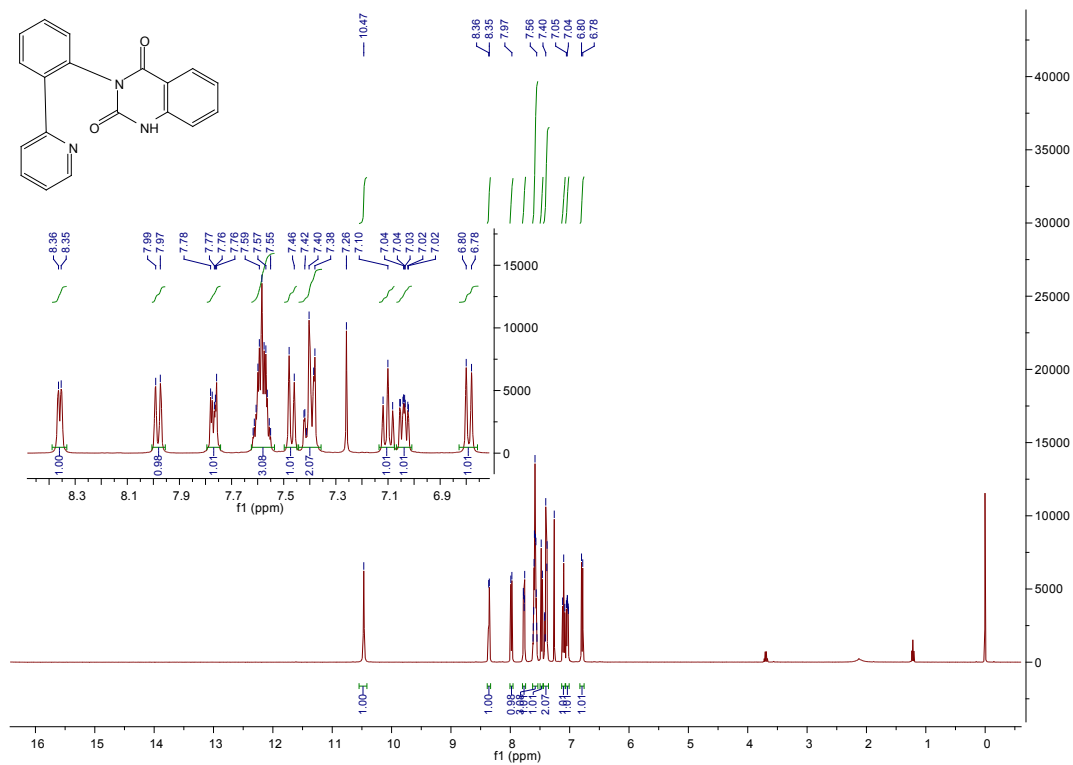

Fig. 65. <sup>1</sup>H NMR of 4k

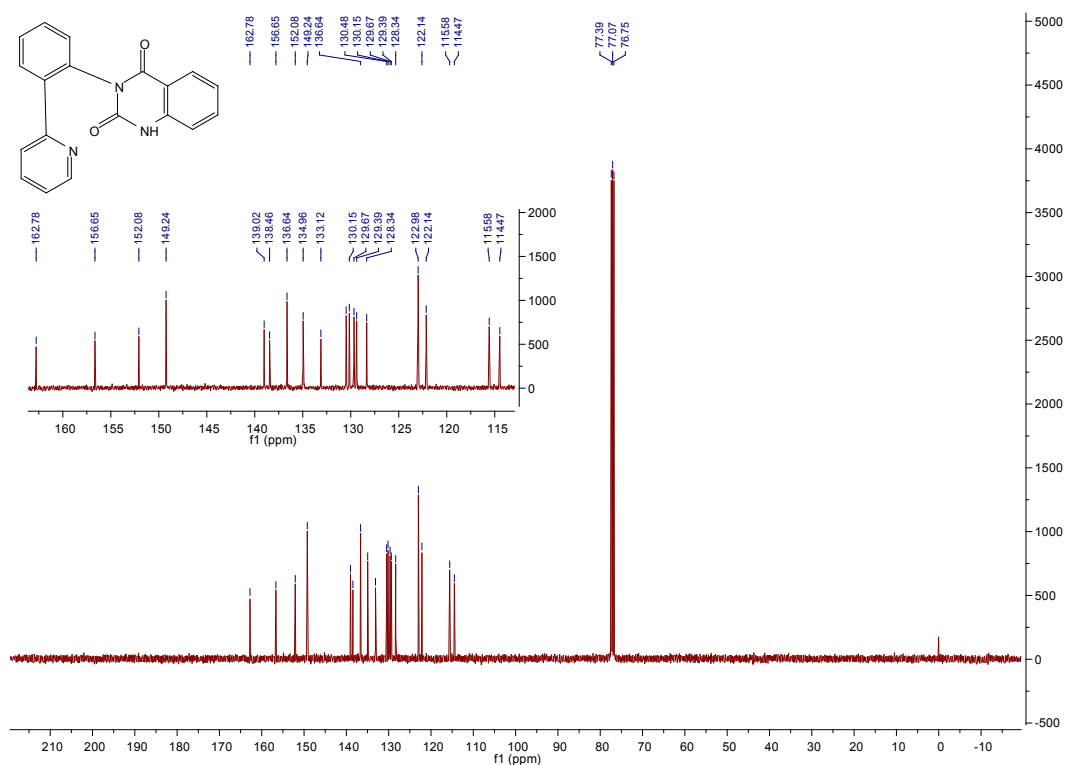

Fig. 66. <sup>13</sup>C NMR of 4k

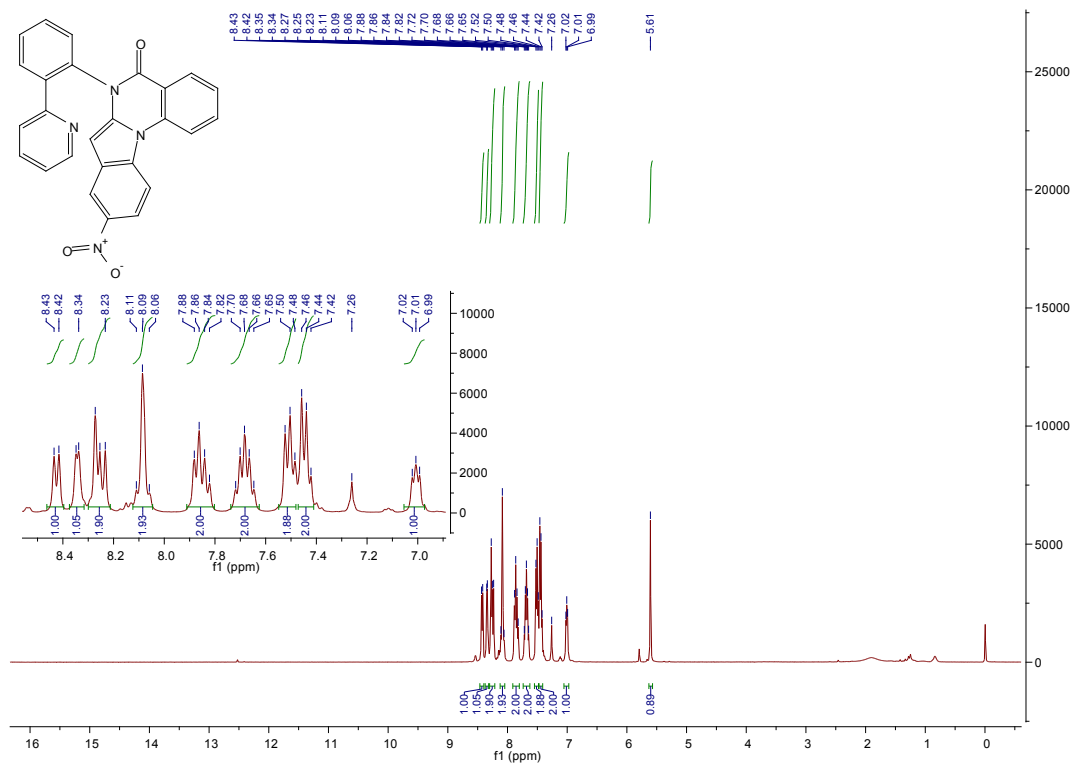

Fig. 67. <sup>1</sup>H NMR of 41

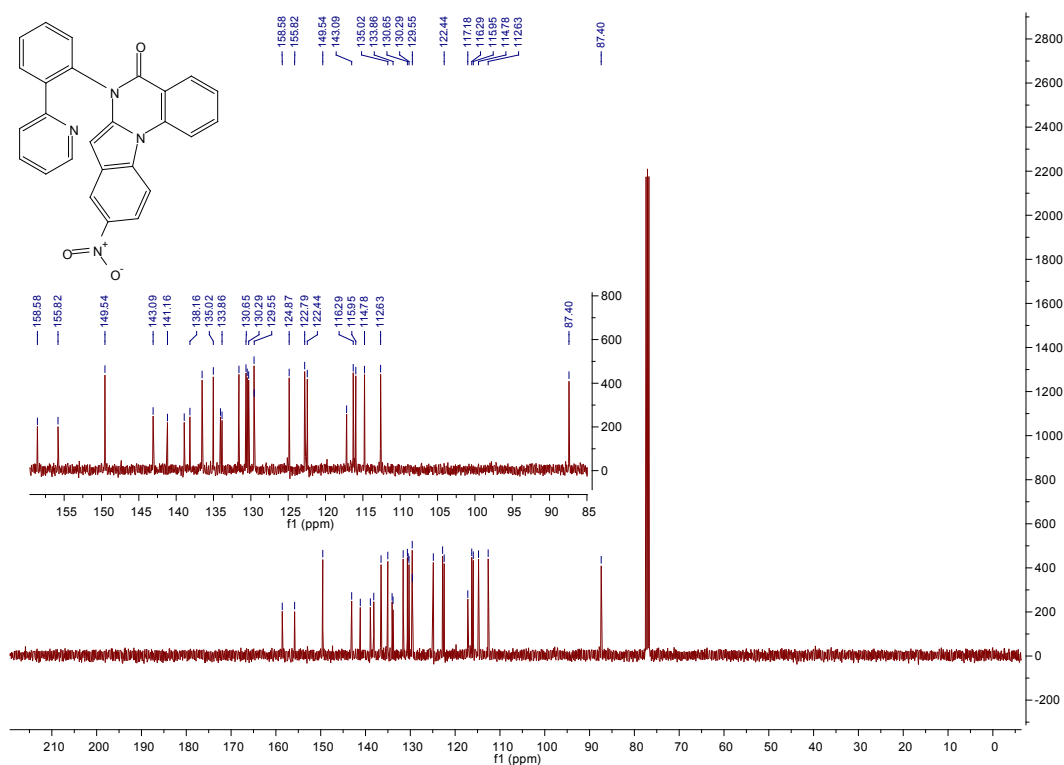

Fig. 68. <sup>13</sup>C NMR of 41

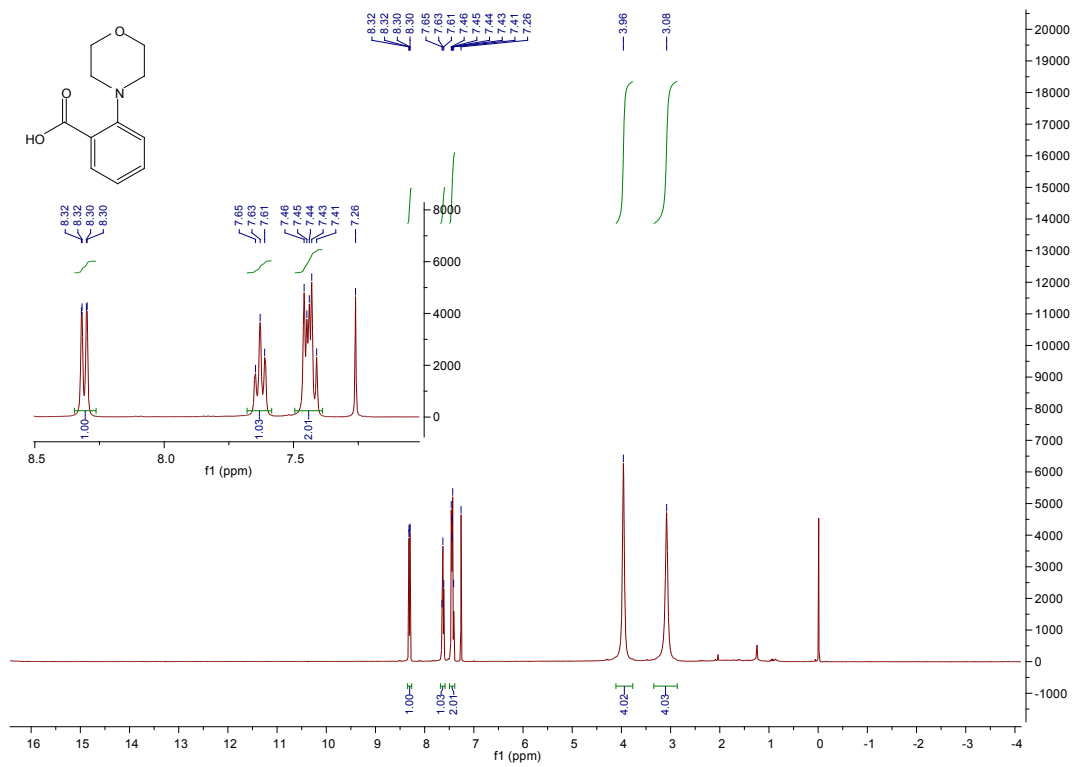

Fig. 69.  $^1\text{H NMR}$  of 5

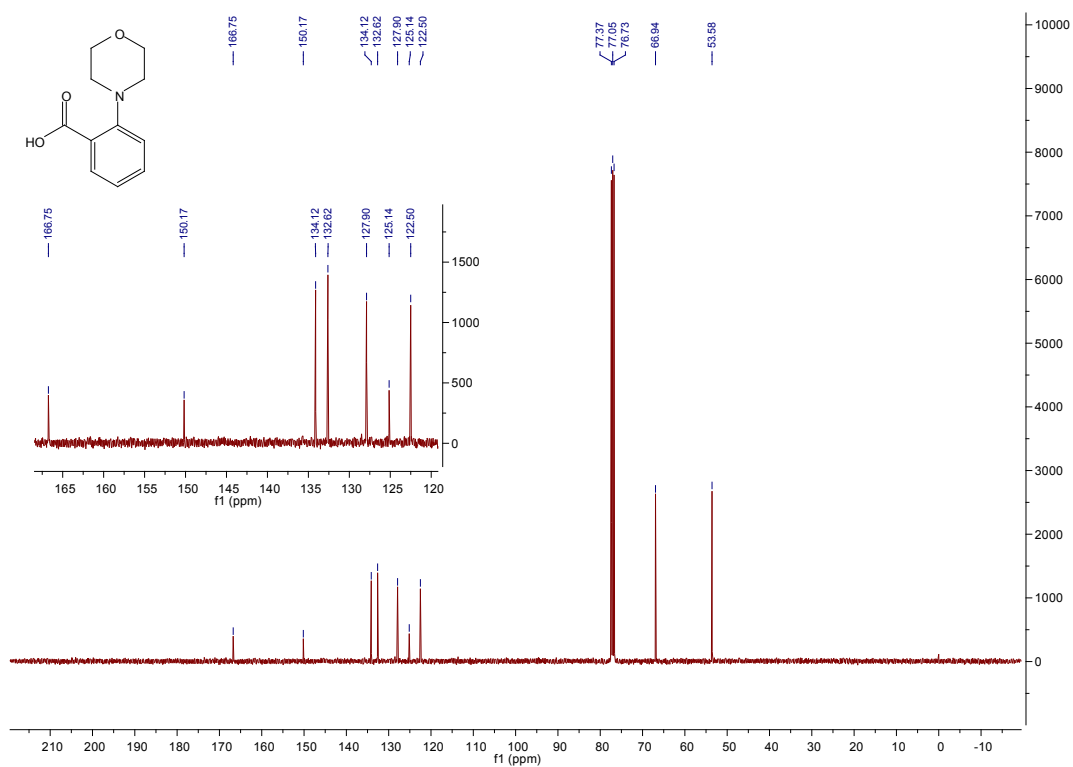

Fig. 70.  $^{13}\text{C NMR}$  of 5
